# Supplementary material for: Intervalence of two planar chiral 2-methylferrocenyl groups over a diaurum bridge
Source: Royal Society of Chemistry journal article supplement (doi:10.1039/c8dt02640h), 2018-01-01
Supplement: c8dt02640h1.pdf [file c8dt02640h1.pdf]

# ELECTRONIC SUPPORTING INFORMATION

## INTERVALENCE OF TWO PLANAR CHIRAL 2-METHYLFERROCENYL GROUPS OVER A DIAURUM BRIDGE

Mark R. Ringenberg<sup>†\*</sup>, Julia Holz<sup>‡</sup>, and René Peters<sup>‡</sup>

<sup>†</sup> Institut für Anorganische Chemie, Universität Stuttgart, Pfaffenwaldring 55, 70550  
Stuttgart, Germany

<sup>‡</sup> Institut für Organische Chemie, Universität Stuttgart, Pfaffenwaldring 55, 70550  
Stuttgart, Germany

# Contents

|     |                                    |    |
|-----|------------------------------------|----|
| 1   | DFT Calculations                   | 3  |
| 2   | Cyclic Voltammetry                 | 5  |
| 3   | Infrared Spectroelectrochemistry   | 6  |
| 4   | Absorption Spectroscopy and TD-DFT | 7  |
| 4.1 | UV-vis-NIR Spectra Fitting         | 7  |
| 5   | DFT Coordinates                    | 31 |

## List of Figures

|    |                                                                                                                   |    |
|----|-------------------------------------------------------------------------------------------------------------------|----|
| 1  | MOs of <b>2X</b>                                                                                                  | 3  |
| 2  | MOs of <b>2OAc</b>                                                                                                | 4  |
| 3  | CV of <b>2X</b>                                                                                                   | 5  |
| 4  | CV of <b>2Cl</b>                                                                                                  | 5  |
| 5  | IR SEC of [ <b>2Cl</b> ] <sup>+</sup> in 0.1 MBu <sub>4</sub> NBAr <sup>F</sup> / CH <sub>2</sub> Cl <sub>2</sub> | 6  |
| 6  | UV-vis-NIR Curve Fit of <b>1<sup>iPr</sup></b>                                                                    | 7  |
| 7  | UV-vis-NIR Curve Fit of <b>2Cl</b>                                                                                | 8  |
| 8  | UV-vis-NIR Curve Fit of <b>2Br</b>                                                                                | 9  |
| 9  | UV-vis-NIR Curve Fit of <b>2OAc</b>                                                                               | 10 |
| 10 | UV-vis-NIR Curve Fit of <b>1<sup>iPr</sup></b>                                                                    | 11 |
| 11 | UV-vis-NIR Curve Fit of <b>2Cl</b>                                                                                | 12 |
| 12 | UV-vis-NIR Curve Fit of <b>2Br</b>                                                                                | 13 |
| 13 | UV-vis-NIR Curve Fit of <b>2OAc</b>                                                                               | 14 |
| 14 | EDDM of <b>1<sup>iPr</sup></b>                                                                                    | 15 |
| 15 | EDDM of <b>1<sup>iPr</sup></b> <sup>+</sup>                                                                       | 16 |
| 16 | EDDM of <b>1<sup>iPr</sup></b> <sup>2+</sup>                                                                      | 18 |
| 17 | EDDM of <b>1<sup>iPr</sup></b> <sup>2+</sup>                                                                      | 19 |
| 18 | EDDM of <b>2Cl</b>                                                                                                | 20 |
| 19 | EDDM of <b>2Cl</b> <sup>+</sup>                                                                                   | 22 |
| 20 | EDDM of <b>2Cl</b> <sup>2+</sup> S1                                                                               | 24 |
| 21 | EDDM of <b>2Cl</b> <sup>2+</sup> S1                                                                               | 26 |
| 22 | EDDM of <b>2I</b>                                                                                                 | 28 |
| 23 | EDDM of <b>2Br</b>                                                                                                | 28 |
| 24 | EDDM of <b>2OAc</b>                                                                                               | 29 |

## List of Tables

|    |                                                                                      |    |
|----|--------------------------------------------------------------------------------------|----|
| 1  | Transitions Determined by TD-DFT of $[\mathbf{1}^{iPr}]^*$ . . . . .                 | 15 |
| 2  | Transitions Determined by TD-DFT of $[\mathbf{1}^{iPr}]^{+*}$ . . . . .              | 17 |
| 3  | Transitions Determined by TD-DFT of $[\mathbf{1}^{iPr}]^{2+*}$ . . . . .             | 18 |
| 4  | Transitions Determined by TD-DFT of S3 $[\mathbf{1}^{iPr}]^{2+*}$ . . . . .          | 20 |
| 5  | Transitions Determined by TD-DFT of $[\mathbf{2Cl}]^*$ . . . . .                     | 21 |
| 6  | Transitions Determined by TD-DFT of $[\mathbf{2Cl}]^{+*}$ . . . . .                  | 23 |
| 7  | Transitions Determined by TD-DFT of $[\mathbf{2Cl}]^{2+}$ S1* . . . . .              | 25 |
| 8  | Transitions Determined by TD-DFT of $[\mathbf{2Cl}]^{2+}$ S1* . . . . .              | 27 |
| 9  | Transitions Determined by TD-DFT of $[\mathbf{2I}]^*$ . . . . .                      | 28 |
| 10 | Transitions Determined by TD-DFT of $[\mathbf{2Br}]^*$ . . . . .                     | 29 |
| 11 | Transitions Determined by TD-DFT of $[\mathbf{2OAc}]^*$ . . . . .                    | 30 |
| 12 | XYZ coordinates for Optimized structure B3LYP $\mathbf{1}^{iPr}$ . . . . .           | 31 |
| 13 | XYZ coordinates for Optimized structure B3LYP $[\mathbf{1}^{iPr}]^+$ . . . . .       | 32 |
| 14 | XYZ coordinates for Optimized structure B3LYP $[\mathbf{1}^{iPr}]^{2+}$ S1 . . . . . | 33 |
| 15 | XYZ coordinates for Optimized structure B3LYP $\mathbf{2Cl}$ . . . . .               | 34 |
| 16 | XYZ coordinates for Optimized structure B3LYP $[\mathbf{2Cl}]^+$ . . . . .           | 35 |
| 17 | XYZ coordinates for Optimized structure B3LYP $[\mathbf{2Cl}]^{2+}$ S1 . . . . .     | 36 |
| 18 | XYZ coordinates for Optimized structure B3LYP $\mathbf{2Br}$ . . . . .               | 37 |
| 19 | XYZ coordinates for Optimized structure B3LYP $\mathbf{2I}$ . . . . .                | 38 |
| 20 | XYZ coordinates for Optimized structure B3LYP $\mathbf{2OAc}$ . . . . .              | 39 |

# 1 DFT Calculations

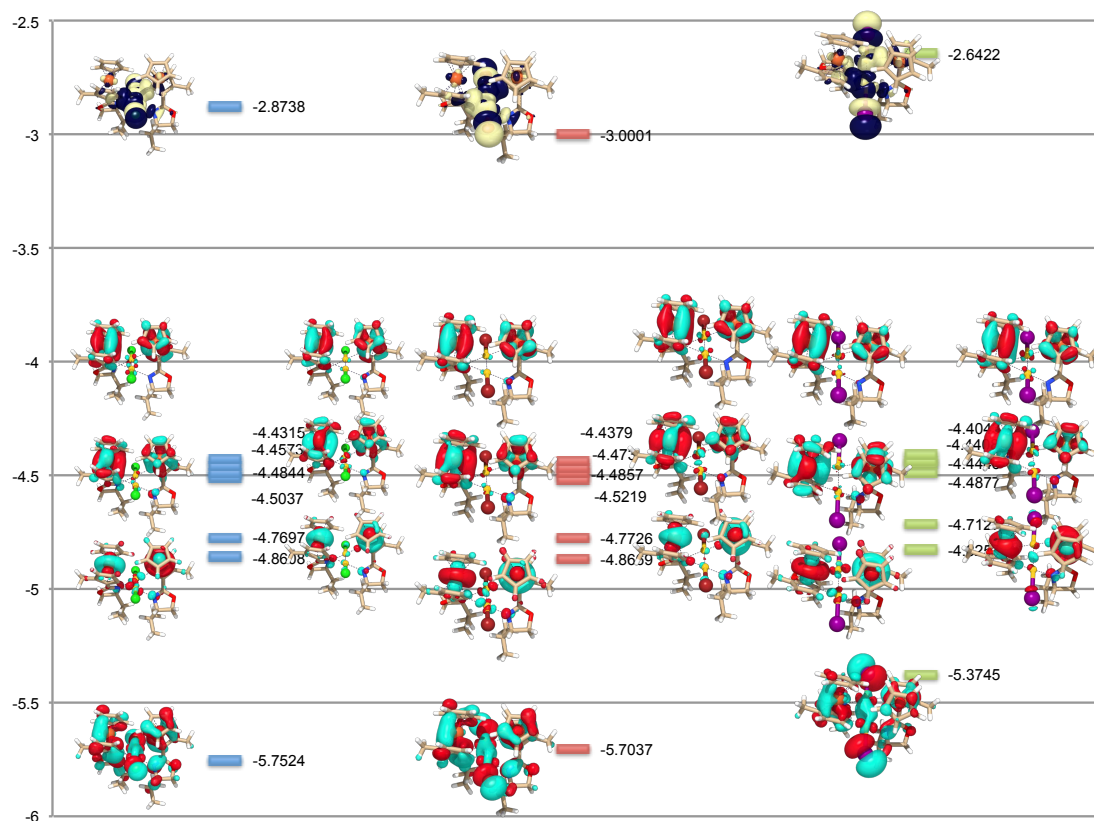

Figure 1: Frontier Kohn-Sham Orbitals and Energy (eV) of **2Cl**, **2Br**, **2I** at B3LYP level of theory.

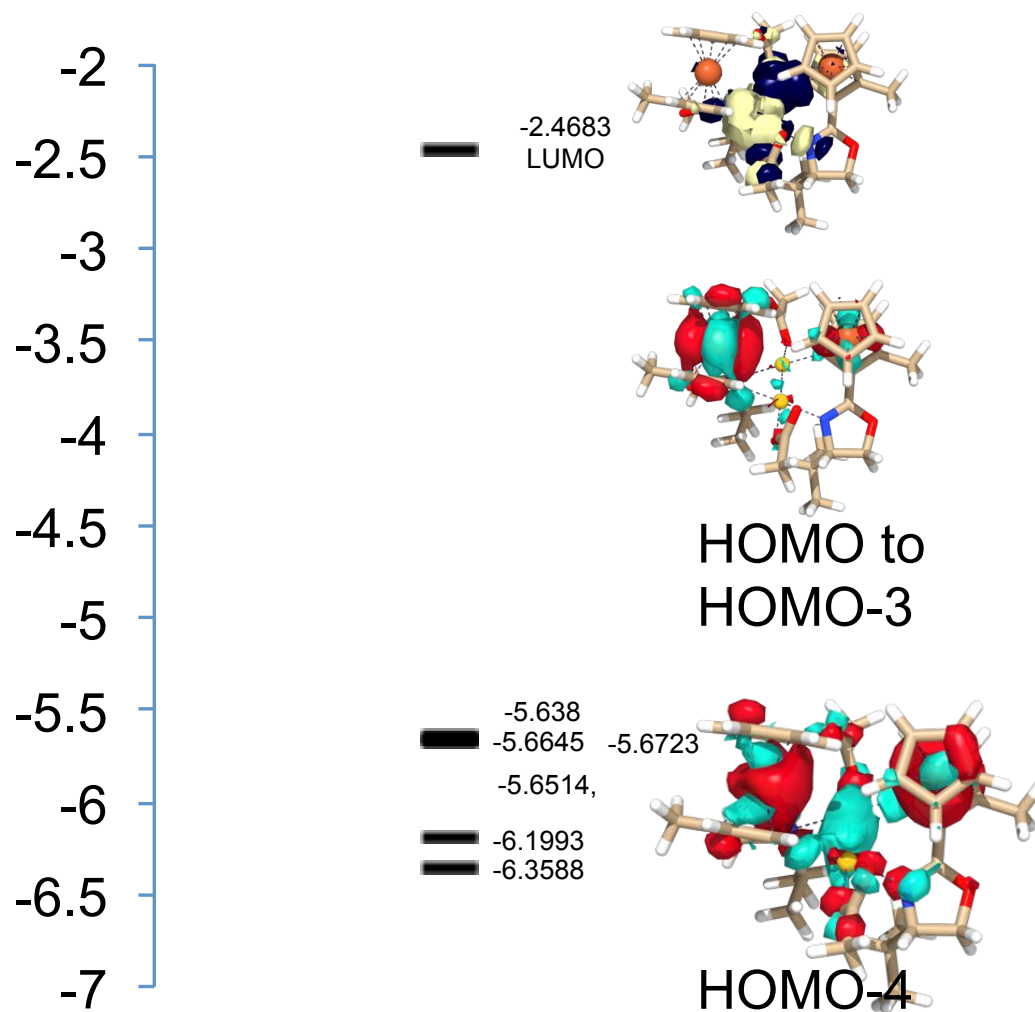

Figure 2: Frontier Kohn-Sham Orbitals and Energy (eV) of 2OAc at B3LYP level of theory. HOMO-1 to HOMO-3 are not pictured but can be represent by different symmetry aligned orbitals based on HOMO shown on both iron atoms

## 2 Cyclic Voltammetry

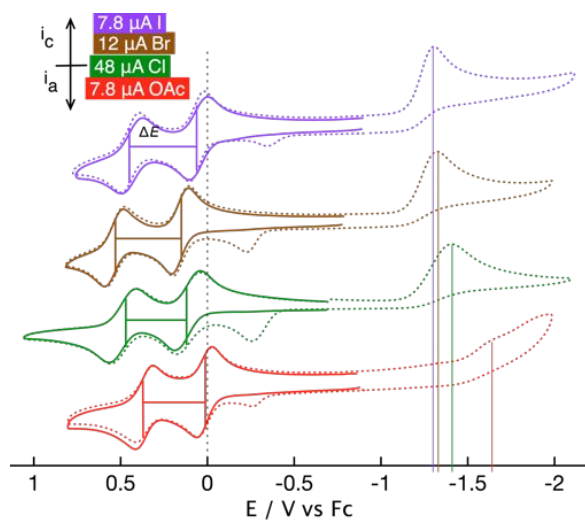

Figure 3: Cyclicvoltammogram of **2X** in 0.1 M  $Bu_4NB(Ar^F)/CH_2Cl_2$

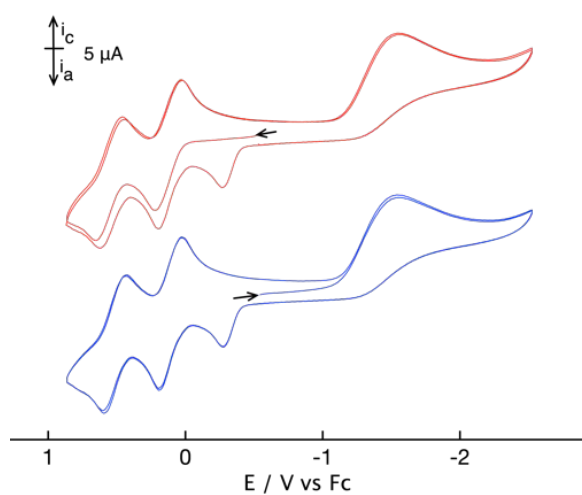

Figure 4: Cyclicvoltammogram of **2Cl** in 0.1 M  $Bu_4NB(Ar^F)/CH_2Cl_2$

### 3 Infrared Spectroelectrochemistry

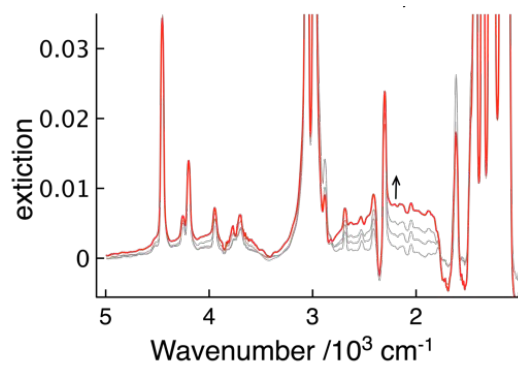

Figure 5: IR SEC of  $[2Cl]^+$  in 0.1  $MBu_4NBAR^F / CH_2Cl_2$

## 4 Absorption Spectroscopy and TD-DFT

### 4.1 UV-vis-NIR Spectra Fitting

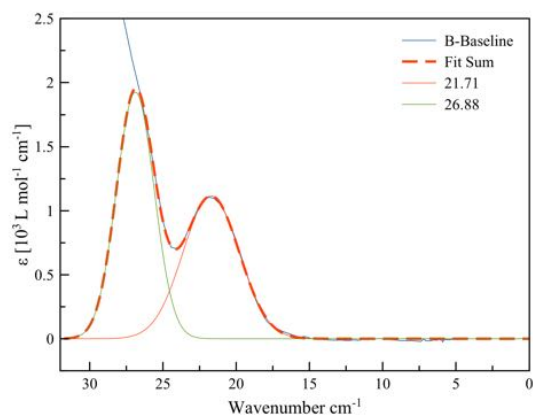

(a)  $\mathbf{1}^{iPr}$

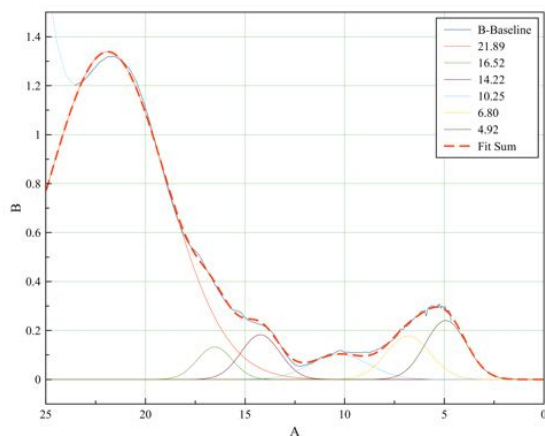

(b)  $[\mathbf{1}^{iPr}]^+$

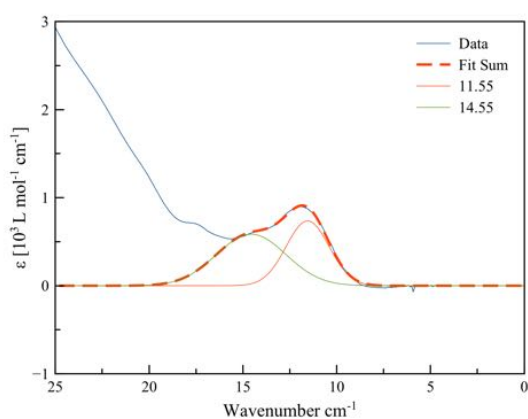

(c)  $[\mathbf{1}^{iPr}]^{2+}$

Figure 6: UV-vis-NIR Spectra for  $\mathbf{1}^{iPr}$  were fitted using Gaussian Curves



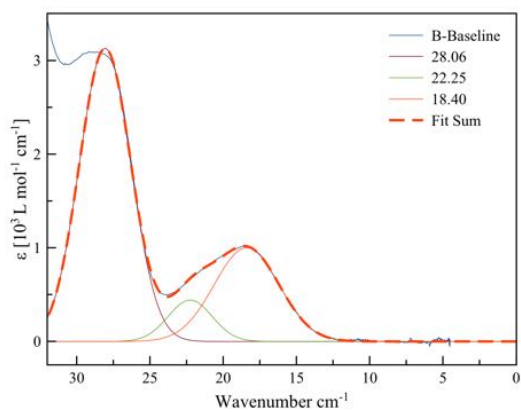

(a)  $2\text{Cl}$

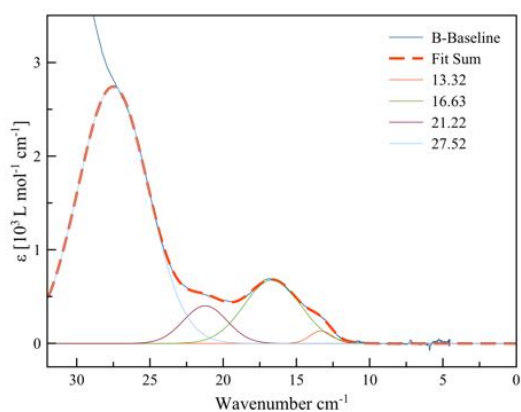

(b)  $[2\text{Cl}]^+$

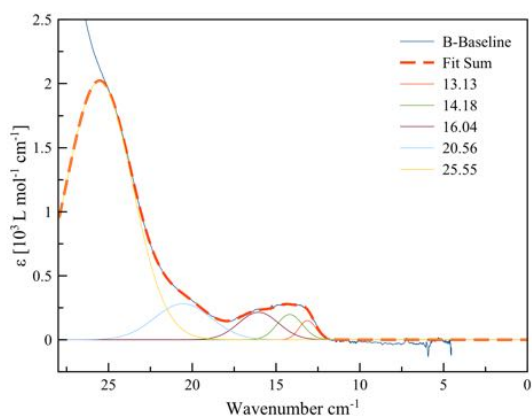

(c)  $[2\text{Cl}]^{2+}$

Figure 7: UV-vis-NIR Spectra of  $2\text{Cl}$  were fitted using Gaussian Curves

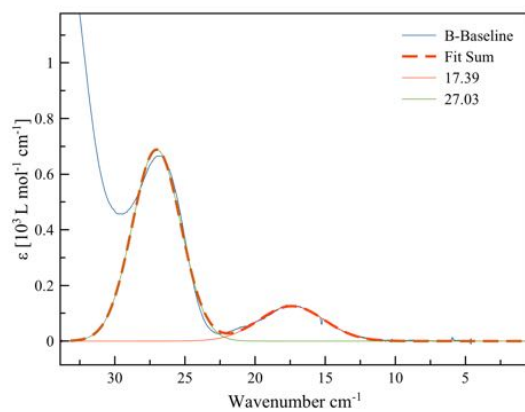

(a) **2Br**

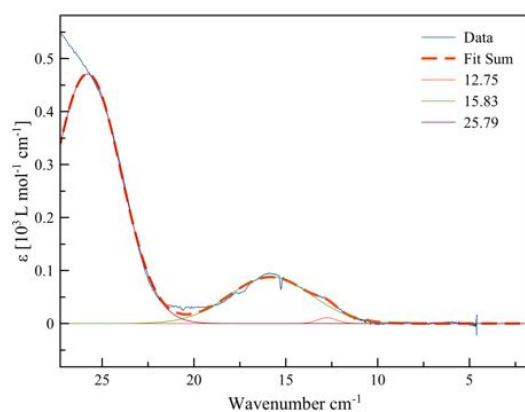

(b)  $[\mathbf{2Br}]^+$

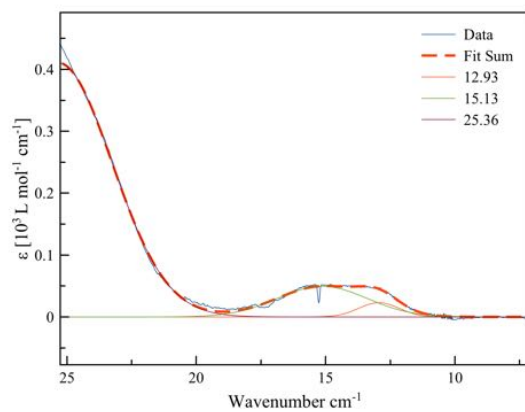

(c)  $[\mathbf{2Br}]^{2+}$

Figure 8: UV-vis-NIR Spectra of **2Br** were fitted using Gaussian Curves

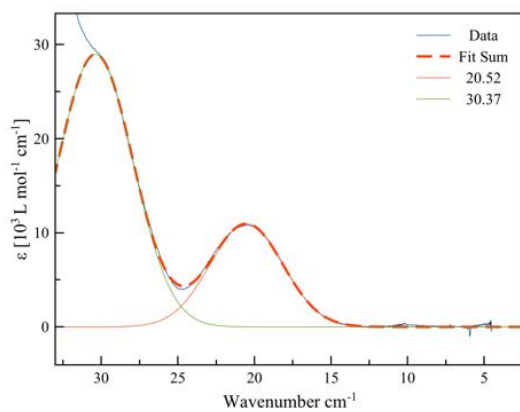

(a) **2OAc**

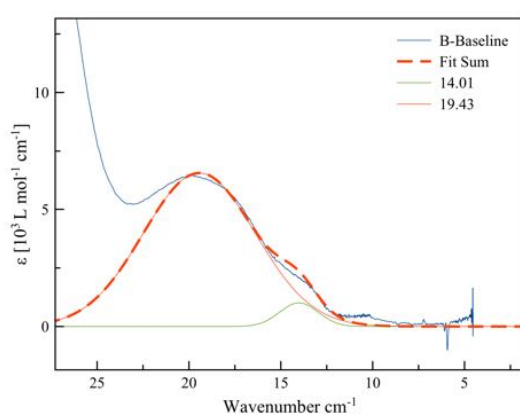

(b)  $[2\text{OAc}]^+$

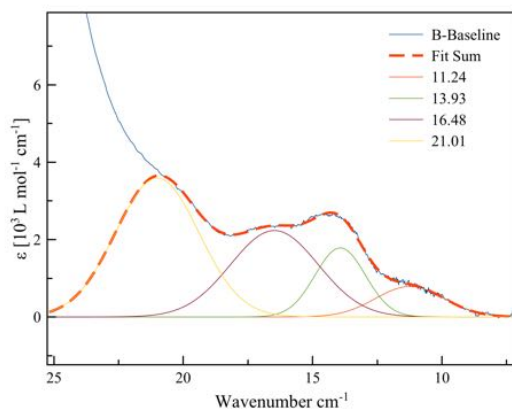

(c)  $[2\text{OAc}]^{2+}$

Figure 9: UV-vis-NIR Spectra of **2OAc** were fitted using Gaussian Curves

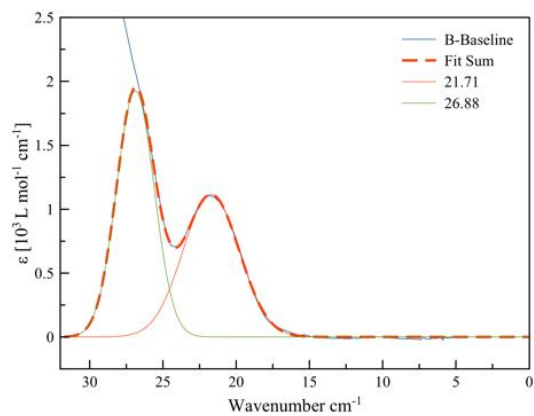

(a)  $\mathbf{1}^{iPr}$

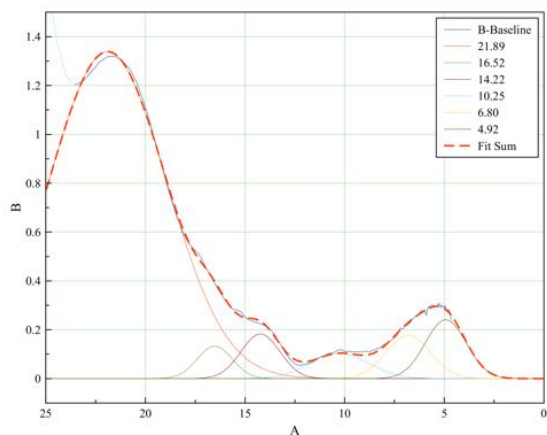

(b)  $[\mathbf{1}^{iPr}]^+$

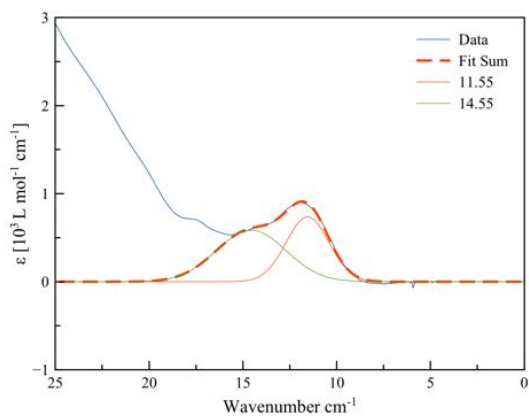

(c)  $[\mathbf{1}^{iPr}]^{2+}$

Figure 10: UV-vis-NIR Spectra for  $\mathbf{1}^{iPr}$  were fitted using Gaussian Curves



(a)  $2\text{Cl}$

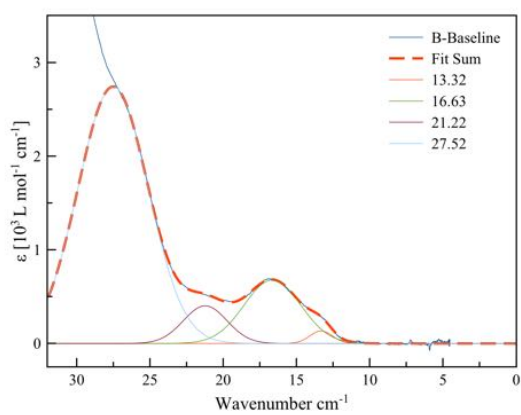

(b)  $[2\text{Cl}]^+$



(c)  $[2\text{Cl}]^{2+}$

Figure 11: UV-vis-NIR Spectra of  $2\text{Cl}$  were fitted using Gaussian Curves



(a) **2Br**



(b)  $[\mathbf{2Br}]^+$



(c)  $[\mathbf{2Br}]^{2+}$

Figure 12: UV-vis-NIR Spectra of **2Br** were fitted using Gaussian Curves



(a) **2OAc**



(b)  $[2\text{OAc}]^+$

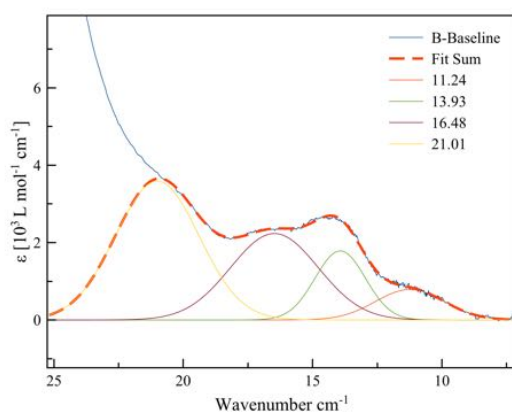

(c)  $[2\text{OAc}]^{2+}$

Figure 13: UV-vis-NIR Spectra of **2OAc** were fitted using Gaussian Curves

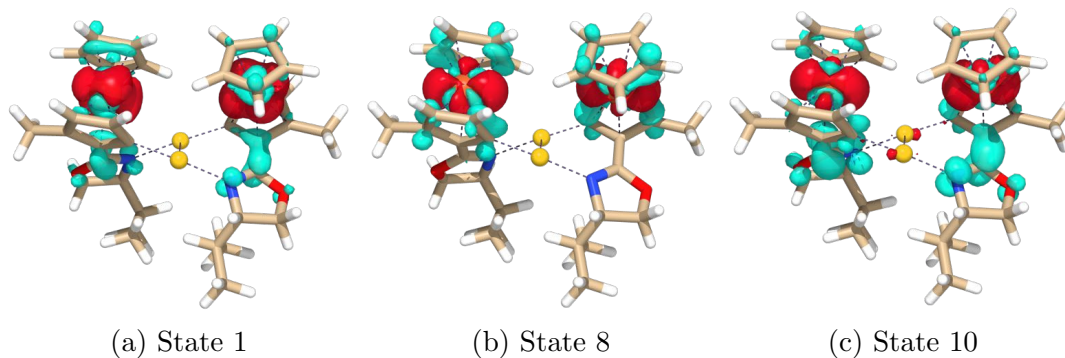

Figure 14: Electron density difference map shown at isosurface = 0.001, of the major transitions found in the UV-Vis NIR spectrum of  $\mathbf{1}^{iPr}$ . Green denotes gain in electron density and red loss of electron density

Table 1: Transitions Determined by TD-DFT of  $[\mathbf{1}^{iPr}]^*$

|           |                |          |                             |
|-----------|----------------|----------|-----------------------------|
| 181       | HOMO           |          |                             |
| 182       | LUMO           |          |                             |
| STATE 1:  | E= 0.086609 au | 2.357 eV | 19008.6 $\text{cm}^{-1}$    |
|           | 177a           | → 184a   | : 0.102595 (c= -0.32030418) |
|           | 178a           | → 183a   | : 0.053070 (c= -0.23037021) |
|           | 178a           | → 185a   | : 0.113285 (c= 0.33657905)  |
|           | 179a           | → 183a   | : 0.162235 (c= 0.40278378)  |
|           | 179a           | → 188a   | : 0.104830 (c= -0.32377401) |
|           | 180a           | → 182a   | : 0.201649 (c= -0.44905325) |
|           | 180a           | → 186a   | : 0.112630 (c= -0.33560405) |
| STATE 8:  | E= 0.099757 au | 2.715 eV | 21894.2 $\text{cm}^{-1}$    |
|           | 173a           | → 185a   | : 0.059423 (c= -0.24376881) |
|           | 175a           | → 185a   | : 0.120935 (c= 0.34775728)  |
|           | 176a           | → 184a   | : 0.107417 (c= -0.32774484) |
|           | 176a           | → 187a   | : 0.056026 (c= 0.23669715)  |
|           | 177a           | → 185a   | : 0.107946 (c= 0.32855181)  |
|           | 179a           | → 184a   | : 0.091531 (c= -0.30254081) |
|           | 180a           | → 185a   | : 0.089635 (c= -0.29939089) |
| STATE 10: | E= 0.124423 au | 3.386 eV | 27307.6 $\text{cm}^{-1}$    |
|           | 176a           | → 182a   | : 0.080167 (c= -0.28313801) |
|           | 177a           | → 185a   | : 0.131109 (c= 0.36209039)  |
|           | 178a           | → 184a   | : 0.144748 (c= -0.38045759) |
|           | 179a           | → 182a   | : 0.227015 (c= -0.47646133) |
|           | 180a           | → 183a   | : 0.095498 (c= 0.30902781)  |



\*transitions below 5% were omitted

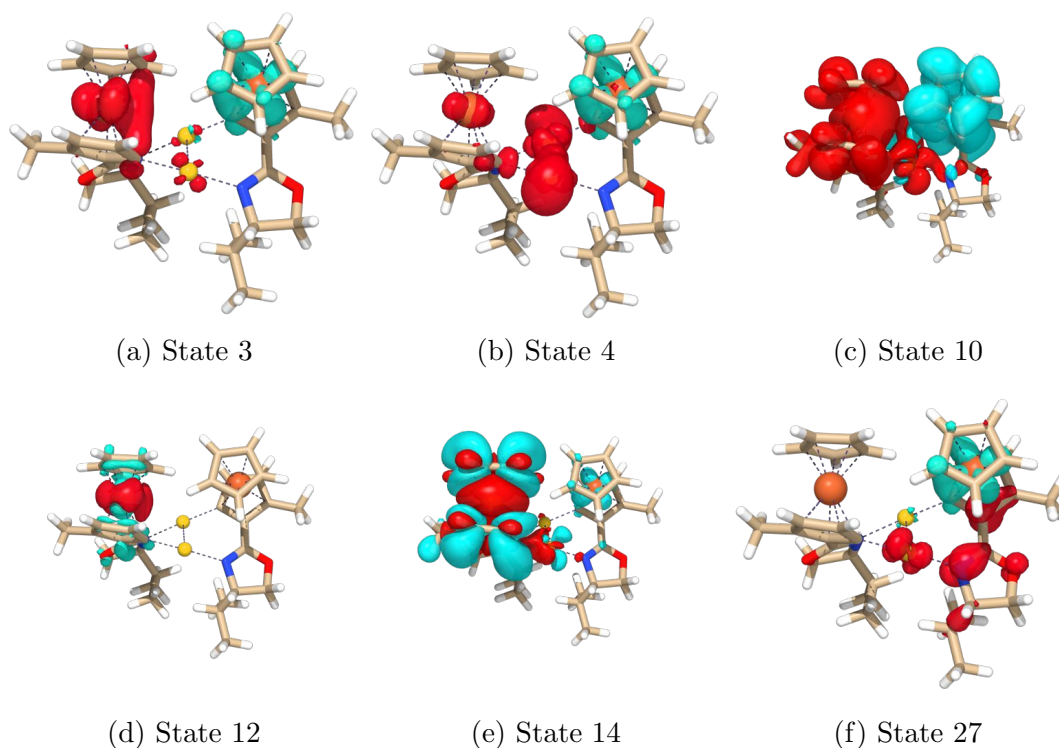

Figure 15: Electron density difference map shown at isosurface = 0.001, of the major transitions found in the UV-Vis NIR spectrum of  $[1^{iPr}]^+$ . Green denotes gain in electron density and red loss of electron density

| $\alpha$ |        |           |         | $\beta$ |        |           |         |
|----------|--------|-----------|---------|---------|--------|-----------|---------|
| No.      | Occ.   | E(Eh)     | E(eV)   | No.     | Occ.   | E(Eh)     | E(eV)   |
| 177      | 1.0000 | -0.247182 | -6.7262 | 177     | 1.0000 | -0.235780 | -6.4159 |
| 178      | 1.0000 | -0.235812 | -6.4168 | 178     | 1.0000 | -0.217424 | -5.9164 |
| 179      | 1.0000 | -0.217563 | -5.9202 | 179     | 1.0000 | -0.211715 | -5.7610 |
| 180      | 1.0000 | -0.211738 | -5.7617 | 180     | 1.0000 | -0.207383 | -5.6432 |
| 181      | 1.0000 | -0.207525 | -5.6471 | 181     | 0.0000 | -0.142015 | -3.8644 |
| 182      | 0.0000 | -0.100977 | -2.7477 | 182     | 0.0000 | -0.078684 | -2.1411 |
| 183      | 0.0000 | -0.096996 | -2.6394 | 183     | 0.0000 | -0.070943 | -1.9305 |
| 184      | 0.0000 | -0.052231 | -1.4213 | 184     | 0.0000 | -0.046787 | -1.2731 |

Table 2: Transitions Determined by TD-DFT of [ $\mathbf{1}^{iPr}$ ] $^{+*}$

|           |                        |          |                           |
|-----------|------------------------|----------|---------------------------|
| STATE 3:  | E= 0.021256 au         | 0.578 eV | 4665.1 $\text{cm}^{-1}$   |
|           | 180b $\longrightarrow$ | 181b :   | 0.966068 (c= -0.98288744) |
| STATE 4:  | E= 0.032902 au         | 0.895 eV | 7221.2 $\text{cm}^{-1}$   |
|           | 178b $\longrightarrow$ | 181b :   | 0.767704 (c= 0.87618719)  |
|           | 179b $\longrightarrow$ | 181b :   | 0.153105 (c= 0.39128605)  |
| STATE 10: | E= 0.049701 au         | 1.352 eV | 10908.1 $\text{cm}^{-1}$  |
|           | 177b $\longrightarrow$ | 181b :   | 0.975202 (c= -0.98752292) |
| STATE 12: | E= 0.080804 au         | 2.199 eV | 17734.5 $\text{cm}^{-1}$  |
|           | 180a $\longrightarrow$ | 186a :   | 0.106427 (c= -0.32623204) |
|           | 181a $\longrightarrow$ | 185a :   | 0.151866 (c= 0.38969975)  |
|           | 181a $\longrightarrow$ | 188a :   | 0.106381 (c= 0.32616133)  |
|           | 179b $\longrightarrow$ | 186b :   | 0.112412 (c= 0.33527872)  |
|           | 180b $\longrightarrow$ | 184b :   | 0.138240 (c= -0.37180652) |
|           | 180b $\longrightarrow$ | 185b :   | 0.059374 (c= 0.24366773)  |
|           | 180b $\longrightarrow$ | 188b :   | 0.104954 (c= -0.32396623) |
| STATE 14: | E= 0.083096 au         | 2.261 eV | 18237.4 $\text{cm}^{-1}$  |
|           | 177a $\longrightarrow$ | 186a :   | 0.051176 (c= -0.22622200) |
|           | 178a $\longrightarrow$ | 186a :   | 0.227087 (c= 0.47653673)  |
|           | 178a $\longrightarrow$ | 187a :   | 0.060023 (c= 0.24499641)  |
|           | 176b $\longrightarrow$ | 186b :   | 0.056480 (c= -0.23765444) |
|           | 177b $\longrightarrow$ | 186b :   | 0.247146 (c= -0.49713771) |
|           | 177b $\longrightarrow$ | 188b :   | 0.045335 (c= -0.21292116) |
| STATE 27: | E= 0.089533 au         | 2.436 eV | 19650.3 $\text{cm}^{-1}$  |
|           | 165b $\longrightarrow$ | 181b :   | 0.063693 (c= 0.25237432)  |
|           | 172b $\longrightarrow$ | 181b :   | 0.123781 (c= -0.35182537) |
|           | 174b $\longrightarrow$ | 181b :   | 0.600514 (c= 0.77492863)  |

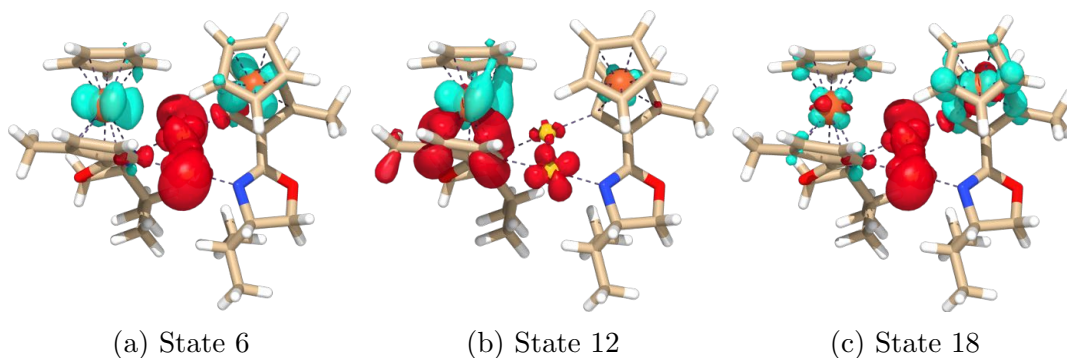

Figure 16: Electron density difference map shown at isosurface = 0.001, of the major transitions found in the UV-Vis NIR spectrum of  $[\mathbf{1}^{iPr}]^{2+}$  antiferromagnetic S1 state. Green denotes gain in electron density and red loss of electron density

| $\alpha$ |        |           |         | $\beta$ |        |           |         |
|----------|--------|-----------|---------|---------|--------|-----------|---------|
| No.      | Occ.   | E(Eh)     | E(eV)   | No.     | Occ.   | E(Eh)     | E(eV)   |
| 177      | 1.0000 | -0.287907 | -7.8344 | 177     | 1.0000 | -0.287913 | -7.8345 |
| 178      | 1.0000 | -0.287716 | -7.8292 | 178     | 1.0000 | -0.287704 | -7.8288 |
| 179      | 1.0000 | -0.282694 | -7.6925 | 179     | 1.0000 | -0.282690 | -7.6924 |
| 180      | 1.0000 | -0.242764 | -6.6060 | 180     | 1.0000 | -0.242762 | -6.6059 |
| 181      | 0.0000 | -0.150618 | -4.0985 | 181     | 0.0000 | -0.150592 | -4.0978 |
| 182      | 0.0000 | -0.117773 | -3.2048 | 182     | 0.0000 | -0.117823 | -3.2061 |
| 183      | 0.0000 | -0.115346 | -3.1387 | 183     | 0.0000 | -0.115444 | -3.1414 |
| 184      | 0.0000 | -0.093389 | -2.5413 | 184     | 0.0000 | -0.093360 | -2.5405 |

Table 3: Transitions Determined by TD-DFT of  $[\mathbf{1}^{iPr}]^{2+*}$

STATE 6: E= 0.053913 au 1.467 eV 11832.6  $^{-1}$   
 180a  $\longrightarrow$  181a : 0.446706 (c= -0.66836084)  
 180b  $\longrightarrow$  181b : 0.500272 (c= -0.70729887)

STATE 12: E= 0.087012 au 2.368 eV 19096.9  $^{-1}$   
 175a  $\longrightarrow$  181a : 0.242541 (c= -0.49248412)  
 176a  $\longrightarrow$  181a : 0.085068 (c= -0.29166420)  
 177a  $\longrightarrow$  181a : 0.296163 (c= 0.54420903)  
 179a  $\longrightarrow$  181a : 0.088709 (c= -0.29783974)

STATE 18: E= 0.092880 au 2.527 eV 20384.8  $^{-1}$   
 180a  $\longrightarrow$  183a : 0.456848 (c= 0.67590510)  
 180b  $\longrightarrow$  183b : 0.236755 (c= 0.48657475)

\*transitions below 5% were omitted S3

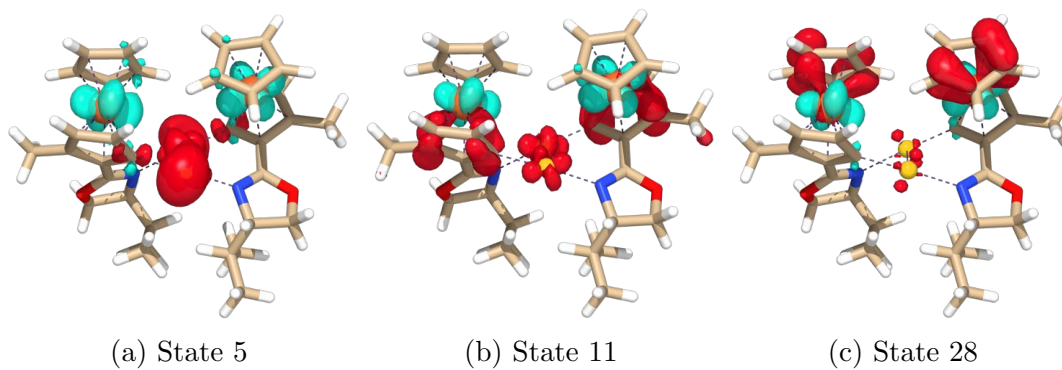

Figure 17: Electron density difference map shown at isosurface = 0.001, of the major transitions found in the UV-Vis NIR spectrum of  $[\mathbf{1}^{iPr}]^{2+}$  antiferromagnetic S3 state. Green denotes gain in electron density and red loss of electron density

| $\alpha$ |        |           |         | $\beta$ |        |           |         |
|----------|--------|-----------|---------|---------|--------|-----------|---------|
| No.      | Occ.   | E(Eh)     | E(eV)   | No.     | Occ.   | E(Eh)     | E(eV)   |
| 177      | 1.0000 | -0.290651 | -7.9090 | 177     | 1.0000 | -0.287485 | -7.8229 |
| 178      | 1.0000 | -0.288371 | -7.8470 | 178     | 1.0000 | -0.282439 | -7.6856 |
| 179      | 1.0000 | -0.287527 | -7.8240 | 179     | 1.0000 | -0.242580 | -6.6009 |
| 180      | 1.0000 | -0.282982 | -7.7003 | 180     | 0.0000 | -0.152514 | -4.1501 |
| 181      | 1.0000 | -0.242878 | -6.6091 | 181     | 0.0000 | -0.148517 | -4.0413 |
| 182      | 0.0000 | -0.118888 | -3.2351 | 182     | 0.0000 | -0.095160 | -2.5894 |
| 183      | 0.0000 | -0.117216 | -3.1896 | 183     | 0.0000 | -0.091964 | -2.5025 |
| 184      | 0.0000 | -0.116065 | -3.1583 | 184     | 0.0000 | -0.088199 | -2.4000 |

Table 4: Transitions Determined by TD-DFT of S3 [ $\mathbf{1}^{iPr}$ ] $^{2+*}$

|           |                               |          |                          |
|-----------|-------------------------------|----------|--------------------------|
| STATE 5:  | E= 0.051931 au                | 1.413 eV | 11397.6 $\text{cm}^{-1}$ |
|           | 179b $\longrightarrow$ 180b : | 0.950009 | (c= 0.97468429)          |
| STATE 11: | E= 0.087896 au                | 2.392 eV | 19290.9 $\text{cm}^{-1}$ |
|           | 173b $\longrightarrow$ 180b : | 0.103834 | (c= -0.32223252)         |
|           | 174b $\longrightarrow$ 181b : | 0.160675 | (c= -0.40084305)         |
|           | 175b $\longrightarrow$ 181b : | 0.129609 | (c= 0.36001211)          |
|           | 176b $\longrightarrow$ 180b : | 0.086054 | (c= 0.29335043)          |
|           | 177b $\longrightarrow$ 180b : | 0.248180 | (c= -0.49817655)         |
|           | 178b $\longrightarrow$ 181b : | 0.072309 | (c= 0.26890389)          |
| STATE 28: | E= 0.109536 au                | 2.981 eV | 24040.5 $\text{cm}^{-1}$ |
|           | 162b $\longrightarrow$ 181b : | 0.056730 | (c= -0.23818117)         |
|           | 163b $\longrightarrow$ 181b : | 0.099099 | (c= -0.31479959)         |
|           | 164b $\longrightarrow$ 180b : | 0.269451 | (c= -0.51908717)         |
|           | 169b $\longrightarrow$ 181b : | 0.096421 | (c= -0.31051752)         |
|           | 172b $\longrightarrow$ 181b : | 0.064787 | (c= 0.25453379)          |

\*transitions below 5% were omitted

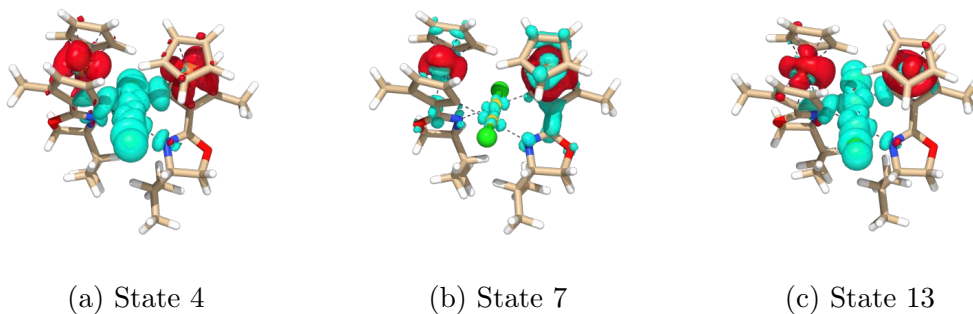

Figure 18: Electron density difference map shown at isosurface = 0.001, of the major transitions found in the UV-Vis NIR spectrum of  $\mathbf{2Cl}$ . Green denotes gain in electron density and red loss of electron density

Table 5: Transitions Determined by TD-DFT of [2Cl]\*

|           |                                                  |
|-----------|--------------------------------------------------|
| 198       | HOMO                                             |
| 199       | LUMO                                             |
| STATE 4:  | E= 0.077590 au 2.111 eV 17029.1 cm <sup>-1</sup> |
|           | 195a → 199a : 0.906230 (c= 0.95196139)           |
| STATE 7:  | E= 0.090973 au 2.475 eV 19966.2 cm <sup>-1</sup> |
|           | 195a → 201a : 0.136718 (c= -0.36975449)          |
|           | 195a → 205a : 0.102150 (c= -0.31960846)          |
|           | 196a → 202a : 0.057151 (c= -0.23906205)          |
|           | 196a → 204a : 0.051122 (c= 0.22610163)           |
|           | 197a → 201a : 0.050725 (c= 0.22522101)           |
|           | 197a → 203a : 0.115087 (c= -0.33924534)          |
|           | 198a → 200a : 0.141502 (c= 0.37616814)           |
|           | 198a → 202a : 0.068468 (c= 0.26166466)           |
|           | 198a → 204a : 0.063336 (c= 0.25166629)           |
| STATE 13: | E= 0.104478 au 2.843 eV 22930.4 cm <sup>-1</sup> |
|           | 194a → 199a : 0.634328 (c= 0.79644730)           |
|           | 198a → 203a : 0.073719 (c= -0.27151295)          |

\*transitions below 5% were omitted

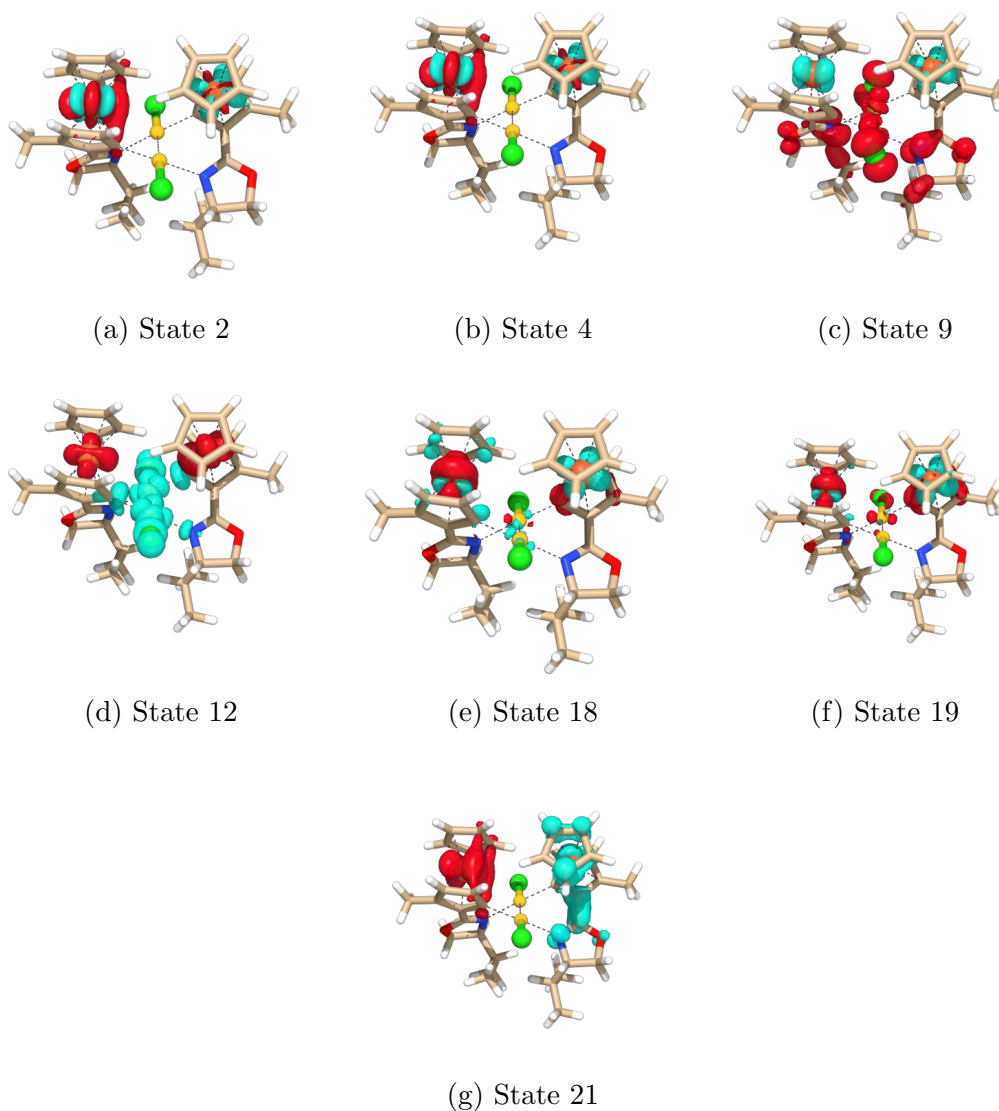

Figure 19: Electron density difference map shown at isosurface = 0.001, of the major transitions found in the UV-Vis NIR spectrum of  $[2C]^+$ . Green denotes gain in electron density and red loss of electron density

| $\alpha$ |        |           |         | $\beta$ |        |           |         |
|----------|--------|-----------|---------|---------|--------|-----------|---------|
| No.      | Occ.   | E(Eh)     | E(eV)   | No.     | Occ.   | E(Eh)     | E(eV)   |
| 195      | 1.0000 | -0.257591 | -7.0094 | 195     | 1.0000 | -0.247599 | -6.7375 |
| 196      | 1.0000 | -0.247679 | -6.7397 | 196     | 1.0000 | -0.223838 | -6.0909 |
| 197      | 1.0000 | -0.223861 | -6.0916 | 197     | 1.0000 | -0.222279 | -6.0485 |
| 198      | 1.0000 | -0.222290 | -6.0488 | 198     | 0.0000 | -0.155772 | -4.2388 |
| 199      | 0.0000 | -0.123363 | -3.3569 | 199     | 0.0000 | -0.122924 | -3.3449 |

Table 6: Transitions Determined by TD-DFT of  $[\mathbf{2Cl}]^{+*}$

|           |                               |          |                          |
|-----------|-------------------------------|----------|--------------------------|
| STATE 2:  | E= 0.012531 au                | 0.341 eV | 2750.2 $\text{cm}^{-1}$  |
|           | 193b $\longrightarrow$ 198b : | 0.556681 | (c= -0.74611082)         |
|           | 194b $\longrightarrow$ 198b : | 0.337635 | (c= 0.58106336)          |
|           | 196b $\longrightarrow$ 198b : | 0.066158 | (c= -0.25721107)         |
| STATE 4:  | E= 0.021778 au                | 0.593 eV | 5046.3 $\text{cm}^{-1}$  |
|           | 195b $\longrightarrow$ 198b : | 0.979251 | (c= 0.98957114)          |
| STATE 9:  | E= 0.059529 au                | 1.620 eV | 13065.2 $\text{cm}^{-1}$ |
|           | 198a $\longrightarrow$ 199a : | 0.713914 | (c= -0.84493405)         |
|           | 197b $\longrightarrow$ 199b : | 0.185042 | (c= -0.43016540)         |
| STATE 12: | E= 0.061998 au                | 1.687 eV | 13607.0 $\text{cm}^{-1}$ |
|           | 197a $\longrightarrow$ 199a : | 0.704757 | (c= 0.83949794)          |
|           | 196b $\longrightarrow$ 199b : | 0.194227 | (c= 0.44071206)          |
| STATE 18: | E= 0.083110 au                | 2.262 eV | 18240.5 $\text{cm}^{-1}$ |
|           | 196a $\longrightarrow$ 204a : | 0.160972 | (c= -0.40121275)         |
|           | 184b $\longrightarrow$ 198b : | 0.062651 | (c= -0.25030224)         |
|           | 192b $\longrightarrow$ 198b : | 0.106547 | (c= 0.32641580)          |
|           | 193b $\longrightarrow$ 198b : | 0.071601 | (c= 0.26758445)          |
|           | 194b $\longrightarrow$ 198b : | 0.050867 | (c= -0.22553790)         |
|           | 195b $\longrightarrow$ 204b : | 0.163884 | (c= -0.40482631)         |
| STATE 19: | E= 0.082202 au                | 2.237 eV | 18041.2 $\text{cm}^{-1}$ |
|           | 196a $\longrightarrow$ 204a : | 0.092920 | (c= 0.30482798)          |
|           | 184b $\longrightarrow$ 198b : | 0.111146 | (c= -0.33338523)         |
|           | 192b $\longrightarrow$ 198b : | 0.207481 | (c= 0.45550068)          |
|           | 193b $\longrightarrow$ 198b : | 0.144571 | (c= 0.38022500)          |
|           | 195b $\longrightarrow$ 204b : | 0.086119 | (c= 0.29346026)          |
| STATE 21: | E= 0.066434 au                | 1.808 eV | 14580.6 $\text{cm}^{-1}$ |
|           | 198a $\longrightarrow$ 200a : | 0.930314 | (c= -0.96452795)         |

\*transitions below 5% were omitted



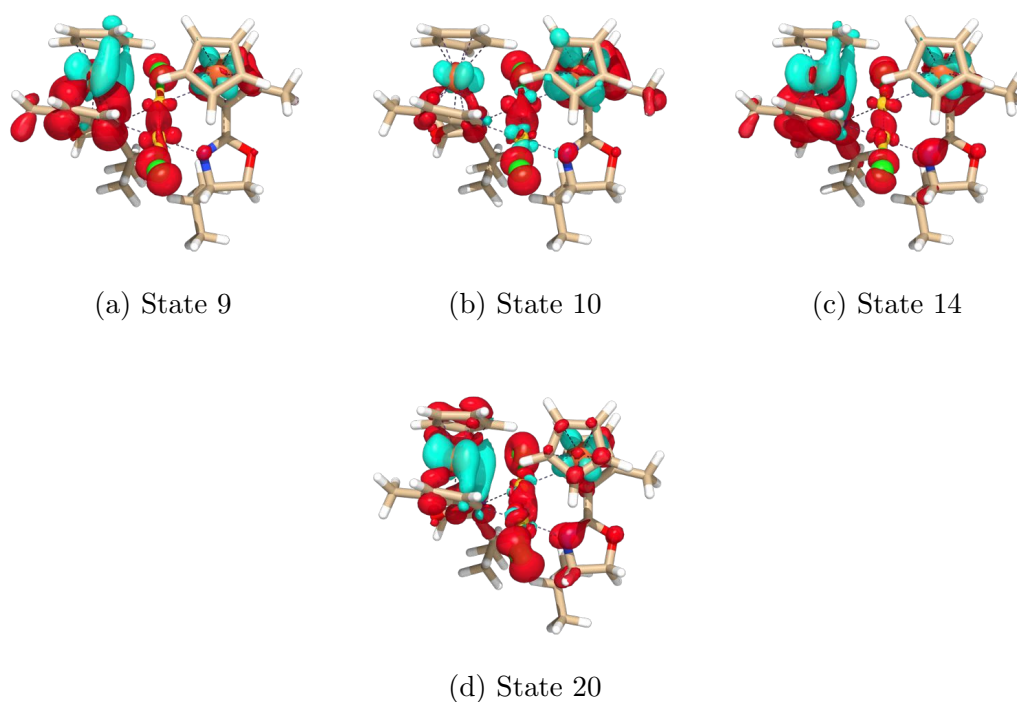

Figure 20: Electron density difference map shown at isosurface = 0.001, of the major transitions found in the UV-Vis NIR spectrum of  $[2\text{Cl}]^{2+}$  S1. Green denotes gain in electron density and red loss of electron density

| $\alpha$ |        |           |         | $\beta$ |        |           |         |
|----------|--------|-----------|---------|---------|--------|-----------|---------|
| No.      | Occ.   | E(Eh)     | E(eV)   | No.     | Occ.   | E(Eh)     | E(eV)   |
| 192      | 1.0000 | -0.308819 | -8.4034 | 192     | 1.0000 | -0.308807 | -8.4031 |
| 193      | 1.0000 | -0.306423 | -8.3382 | 193     | 1.0000 | -0.306427 | -8.3383 |
| 194      | 1.0000 | -0.303952 | -8.2709 | 194     | 1.0000 | -0.303950 | -8.2709 |
| 195      | 1.0000 | -0.302650 | -8.2355 | 195     | 1.0000 | -0.302607 | -8.2344 |
| 196      | 1.0000 | -0.298514 | -8.1230 | 196     | 1.0000 | -0.298519 | -8.1231 |
| 197      | 1.0000 | -0.284621 | -7.7449 | 197     | 1.0000 | -0.284621 | -7.7449 |
| 198      | 0.0000 | -0.164302 | -4.4709 | 198     | 0.0000 | -0.164400 | -4.4735 |
| 199      | 0.0000 | -0.147394 | -4.0108 | 199     | 0.0000 | -0.147348 | -4.0095 |

Table 7: Transitions Determined by TD-DFT of  $[\mathbf{2Cl}]^{2+}$  S1\*

|           |                               |          |                          |
|-----------|-------------------------------|----------|--------------------------|
| STATE 9:  | E= 0.086950 au                | 2.366 eV | 19083.3 $\text{cm}^{-1}$ |
|           | 197a $\longrightarrow$ 198a : | 0.076423 | (c= -0.27644730)         |
|           | 188b $\longrightarrow$ 198b : | 0.053792 | (c= -0.23193140)         |
|           | 189b $\longrightarrow$ 198b : | 0.077280 | (c= 0.27799221)          |
|           | 191b $\longrightarrow$ 198b : | 0.053099 | (c= -0.23043240)         |
|           | 195b $\longrightarrow$ 198b : | 0.129461 | (c= -0.35980726)         |
|           | 197b $\longrightarrow$ 198b : | 0.302097 | (c= -0.54963319)         |
| STATE 10: | E= 0.087478 au                | 2.380 eV | 19199.2 $\text{cm}^{-1}$ |
|           | 189a $\longrightarrow$ 198a : | 0.074912 | (c= -0.27370093)         |
|           | 191a $\longrightarrow$ 198a : | 0.050080 | (c= -0.22378469)         |
|           | 195a $\longrightarrow$ 198a : | 0.116349 | (c= 0.34109993)          |
|           | 197a $\longrightarrow$ 198a : | 0.306890 | (c= 0.55397674)          |
|           | 197b $\longrightarrow$ 198b : | 0.086595 | (c= -0.29427068)         |
| STATE 14: | E= 0.095937 au                | 2.611 eV | 21055.7 $\text{cm}^{-1}$ |
|           | 194a $\longrightarrow$ 198a : | 0.053196 | (c= -0.23064283)         |
|           | 195a $\longrightarrow$ 198a : | 0.052198 | (c= -0.22846936)         |
|           | 197a $\longrightarrow$ 198a : | 0.091736 | (c= 0.30287937)          |
|           | 194b $\longrightarrow$ 198b : | 0.088017 | (c= 0.29667664)          |
|           | 195b $\longrightarrow$ 198b : | 0.090428 | (c= -0.30071279)         |
|           | 196b $\longrightarrow$ 198b : | 0.089426 | (c= 0.29904207)          |
|           | 197b $\longrightarrow$ 198b : | 0.154588 | (c= 0.39317686)          |
| STATE 20: | E= 0.105268 au                | 2.864 eV | 23103.7 $\text{cm}^{-1}$ |
|           | 196a $\longrightarrow$ 198a : | 0.101935 | (c= -0.31927320)         |
|           | 184b $\longrightarrow$ 198b : | 0.056941 | (c= -0.23862367)         |
|           | 196b $\longrightarrow$ 198b : | 0.216154 | (c= 0.46492344)          |
|           | 197b $\longrightarrow$ 198b : | 0.102547 | (c= -0.32022973)         |

\*transitions below 5% were omitted



Figure 21: Electron density difference map shown at isosurface = 0.001, of the major transitions found in the UV-Vis NIR spectrum of  $[2\text{Cl}]^{2+}$  S1. Green denotes gain in electron density and red loss of electron density

| $\alpha$ |        |           |         | $\beta$ |        |           |         |
|----------|--------|-----------|---------|---------|--------|-----------|---------|
| No.      | Occ.   | E(Eh)     | E(eV)   | No.     | Occ.   | E(Eh)     | E(eV)   |
| 192      | 1.0000 | -0.308819 | -8.4034 | 192     | 1.0000 | -0.308807 | -8.4031 |
| 193      | 1.0000 | -0.306423 | -8.3382 | 193     | 1.0000 | -0.306427 | -8.3383 |
| 194      | 1.0000 | -0.303952 | -8.2709 | 194     | 1.0000 | -0.303950 | -8.2709 |
| 195      | 1.0000 | -0.302650 | -8.2355 | 195     | 1.0000 | -0.302607 | -8.2344 |
| 196      | 1.0000 | -0.298514 | -8.1230 | 196     | 1.0000 | -0.298519 | -8.1231 |
| 197      | 1.0000 | -0.284621 | -7.7449 | 197     | 1.0000 | -0.284621 | -7.7449 |
| 198      | 0.0000 | -0.164302 | -4.4709 | 198     | 0.0000 | -0.164400 | -4.4735 |
| 199      | 0.0000 | -0.147394 | -4.0108 | 199     | 0.0000 | -0.147348 | -4.0095 |

Table 8: Transitions Determined by TD-DFT of  $[\mathbf{2Cl}]^{2+}$  S1\*

|           |                               |          |                          |
|-----------|-------------------------------|----------|--------------------------|
| STATE 9:  | E= 0.086950 au                | 2.366 eV | 19083.3 $\text{cm}^{-1}$ |
|           | 197a $\longrightarrow$ 198a : | 0.076423 | (c= -0.27644730)         |
|           | 188b $\longrightarrow$ 198b : | 0.053792 | (c= -0.23193140)         |
|           | 189b $\longrightarrow$ 198b : | 0.077280 | (c= 0.27799221)          |
|           | 191b $\longrightarrow$ 198b : | 0.053099 | (c= -0.23043240)         |
|           | 195b $\longrightarrow$ 198b : | 0.129461 | (c= -0.35980726)         |
|           | 197b $\longrightarrow$ 198b : | 0.302097 | (c= -0.54963319)         |
| STATE 10: | E= 0.087478 au                | 2.380 eV | 19199.2 $\text{cm}^{-1}$ |
|           | 189a $\longrightarrow$ 198a : | 0.074912 | (c= -0.27370093)         |
|           | 191a $\longrightarrow$ 198a : | 0.050080 | (c= -0.22378469)         |
|           | 195a $\longrightarrow$ 198a : | 0.116349 | (c= 0.34109993)          |
|           | 197a $\longrightarrow$ 198a : | 0.306890 | (c= 0.55397674)          |
|           | 197b $\longrightarrow$ 198b : | 0.086595 | (c= -0.29427068)         |
| STATE 14: | E= 0.095937 au                | 2.611 eV | 21055.7 $\text{cm}^{-1}$ |
|           | 194a $\longrightarrow$ 198a : | 0.053196 | (c= -0.23064283)         |
|           | 195a $\longrightarrow$ 198a : | 0.052198 | (c= -0.22846936)         |
|           | 197a $\longrightarrow$ 198a : | 0.091736 | (c= 0.30287937)          |
|           | 194b $\longrightarrow$ 198b : | 0.088017 | (c= 0.29667664)          |
|           | 195b $\longrightarrow$ 198b : | 0.090428 | (c= -0.30071279)         |
|           | 196b $\longrightarrow$ 198b : | 0.089426 | (c= 0.29904207)          |
|           | 197b $\longrightarrow$ 198b : | 0.154588 | (c= 0.39317686)          |
| STATE 20: | E= 0.105268 au                | 2.864 eV | 23103.7 $\text{cm}^{-1}$ |
|           | 196a $\longrightarrow$ 198a : | 0.101935 | (c= -0.31927320)         |
|           | 184b $\longrightarrow$ 198b : | 0.056941 | (c= -0.23862367)         |
|           | 196b $\longrightarrow$ 198b : | 0.216154 | (c= 0.46492344)          |
|           | 197b $\longrightarrow$ 198b : | 0.102547 | (c= -0.32022973)         |

\*transitions below 5% were omitted

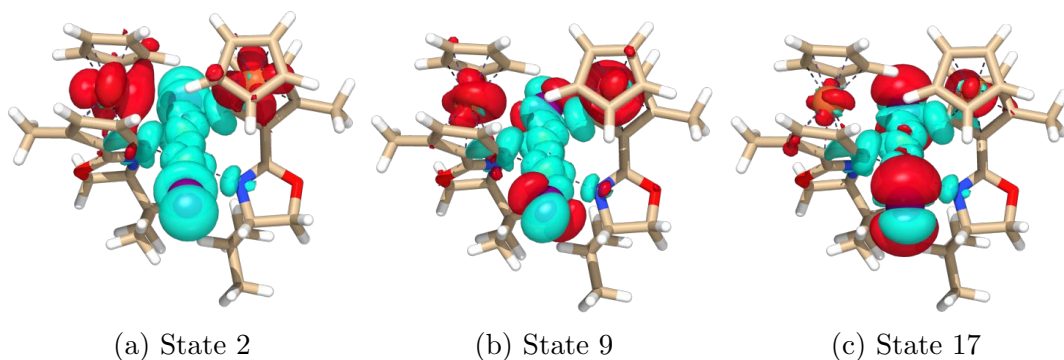

Figure 22: Electron density difference map shown at isosurface = 0.001, of the major transitions found in the UV-Vis NIR spectrum of **2I**. Green denotes gain in electron density and red loss of electron density

Table 9: Transitions Determined by TD-DFT of [**2I**]\*

|           |                                                        |
|-----------|--------------------------------------------------------|
| 206       | HOMO                                                   |
| 207       | LUMO                                                   |
| STATE 2:  | E= 0.069168 au    1.882 eV    15180.5 cm <sup>-1</sup> |
|           | 202a → 207a : 0.087052 (c= -0.29504605)                |
|           | 206a → 207a : 0.859977 (c= 0.92734947)                 |
| STATE 9:  | E= 0.093528 au    2.545 eV    20527.0 cm <sup>-1</sup> |
|           | 198a → 207a : 0.236785 (c= 0.48660549)                 |
|           | 202a → 207a : 0.554557 (c= 0.74468598)                 |
| STATE 17: | E= 0.105166 au    2.862 eV    23081.2 cm <sup>-1</sup> |
|           | 196a → 207a : 0.676916 (c= 0.82274884)                 |
|           | 198a → 207a : 0.163746 (c= -0.40465513)                |

\*transitions below 5% were omitted

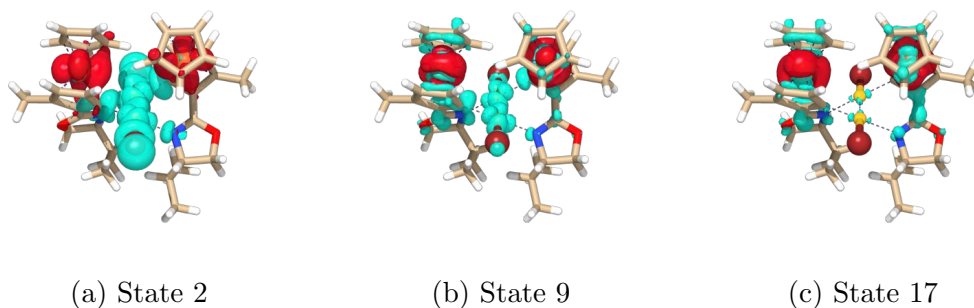

Figure 23: Electron density difference map shown at isosurface = 0.001, of the major transitions found in the UV-Vis NIR spectrum of **2Br**. Green denotes gain in electron density and red loss of electron density

Table 10: Transitions Determined by TD-DFT of [2Br]\*

|          |                |          |                          |  |
|----------|----------------|----------|--------------------------|--|
| 216      | HOMO           |          |                          |  |
| 217      | LUMO           |          |                          |  |
| STATE 2: | E= 0.072363 au | 1.969 eV | 15881.8 cm <sup>-1</sup> |  |
|          | 216a → 217a :  | 0.932768 | (c= -0.96579900)         |  |
| STATE 7: | E= 0.091099 au | 2.479 eV | 19994.0 cm <sup>-1</sup> |  |
|          | 213a → 219a :  | 0.142822 | (c= 0.37791821)          |  |
|          | 213a → 223a :  | 0.106708 | (c= 0.32666128)          |  |
|          | 214a → 218a :  | 0.052266 | (c= -0.22861730)         |  |
|          | 214a → 222a :  | 0.062173 | (c= -0.24934525)         |  |
|          | 215a → 221a :  | 0.123557 | (c= -0.35150650)         |  |
|          | 216a → 218a :  | 0.138514 | (c= 0.37217467)          |  |
|          | 216a → 220a :  | 0.081773 | (c= -0.28595937)         |  |
|          | 216a → 222a :  | 0.056923 | (c= 0.23858588)          |  |
| STATE 9: | E= 0.098512 au | 2.681 eV | 21620.8 cm <sup>-1</sup> |  |
|          | 210a → 219a :  | 0.050910 | (c= -0.22563333)         |  |
|          | 210a → 223a :  | 0.040854 | (c= -0.20212303)         |  |
|          | 211a → 218a :  | 0.133535 | (c= 0.36542481)          |  |
|          | 211a → 222a :  | 0.096895 | (c= 0.31127969)          |  |
|          | 212a → 217a :  | 0.187481 | (c= 0.43299118)          |  |
|          | 212a → 219a :  | 0.093875 | (c= 0.30638991)          |  |
|          | 212a → 223a :  | 0.058372 | (c= 0.24160222)          |  |
|          | 213a → 220a :  | 0.070797 | (c= 0.26607710)          |  |
|          | 214a → 221a :  | 0.096247 | (c= 0.31023734)          |  |

\*transitions below 5% were omitted

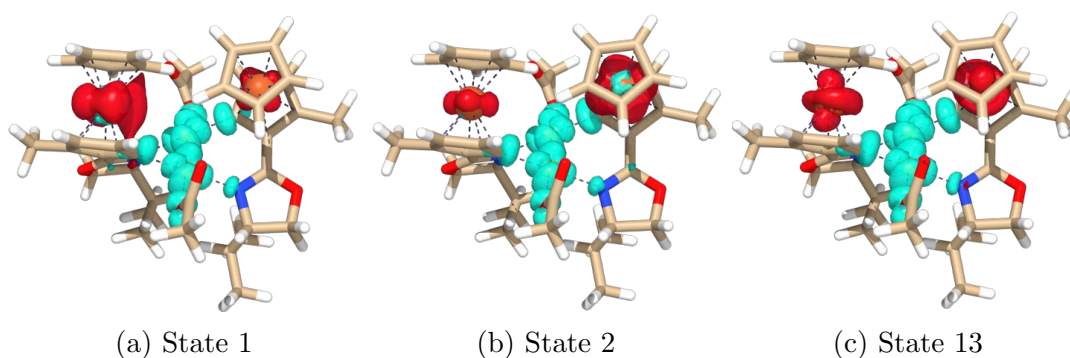

Figure 24: Electron density difference map shown at isosurface = 0.001, of the major transitions found in the UV-Vis NIR spectrum of 2OAc. Green denotes gain in electron density and red loss of electron density

Table 11: Transitions Determined by TD-DFT of [2OAc]\*

|           |                                                        |
|-----------|--------------------------------------------------------|
| 212       | HOMO                                                   |
| 213       | LUMO                                                   |
| STATE 1:  | E= 0.083112 au    2.262 eV    18241.0 cm <sup>-1</sup> |
|           | 211a → 213a : 0.423300 (c= 0.65061488)                 |
|           | 212a → 213a : 0.259343 (c= 0.50925736)                 |
|           | 212a → 216a : 0.041156 (c= -0.20286932)                |
| STATE 2:  | E= 0.084359 au    2.296 eV    18514.6 cm <sup>-1</sup> |
|           | 209a → 214a : 0.067354 (c= 0.25952677)                 |
|           | 211a → 213a : 0.233385 (c= 0.48309963)                 |
|           | 212a → 213a : 0.351301 (c= -0.59270612)                |
| STATE 13: | E= 0.108397 au    2.950 eV    23790.3 cm <sup>-1</sup> |
|           | 208a → 213a : 0.864549 (c= 0.92981148)                 |

\*transitions below 5% were omitted

## 5 DFT Coordinates

Table 12: XYZ coordinates for Optimized structure B3LYP 1<sup>Pr</sup>

|    |           |           |           |    |           |           |          |
|----|-----------|-----------|-----------|----|-----------|-----------|----------|
| Au | 17.840983 | 13.359789 | 4.623573  | Au | 18.295158 | 13.360977 | 1.814890 |
| Fe | 15.160862 | 15.650237 | 3.336520  | Fe | 20.974564 | 15.650922 | 3.104179 |
| O  | 14.200781 | 12.057936 | 1.779951  | O  | 21.935678 | 12.057741 | 4.657182 |
| N  | 16.373644 | 12.566951 | 1.563693  | N  | 19.762789 | 12.566382 | 4.874277 |
| C  | 15.967874 | 14.030862 | 4.389515  | C  | 20.167998 | 14.032502 | 2.049313 |
| C  | 15.002926 | 13.636250 | 3.361682  | C  | 21.133067 | 13.636992 | 3.076670 |
| C  | 13.712108 | 14.257464 | 3.635962  | C  | 22.423702 | 14.258922 | 2.803094 |
| C  | 13.890284 | 15.047682 | 4.815726  | C  | 22.245250 | 15.050450 | 1.624240 |
| H  | 13.120018 | 15.669616 | 5.268096  | H  | 23.015313 | 15.673136 | 1.172561 |
| C  | 15.246164 | 14.919530 | 5.256437  | C  | 20.889390 | 14.922405 | 1.183411 |
| H  | 15.675975 | 15.427178 | 6.117004  | H  | 20.459411 | 15.430903 | 0.323433 |
| C  | 16.642314 | 16.536908 | 2.233743  | C  | 19.492919 | 16.535890 | 4.208010 |
| H  | 17.647554 | 16.136187 | 2.129117  | H  | 18.487822 | 16.134681 | 4.312153 |
| C  | 15.525381 | 16.196866 | 1.401884  | C  | 20.609989 | 16.195277 | 5.039457 |
| H  | 15.548151 | 15.503921 | 0.563932  | H  | 20.587481 | 15.501344 | 5.876596 |
| C  | 14.369104 | 16.877492 | 1.903998  | C  | 21.766017 | 16.876838 | 4.538046 |
| H  | 13.358456 | 16.796414 | 1.511115  | H  | 22.776712 | 16.795640 | 4.930788 |
| C  | 14.769100 | 17.638698 | 3.052141  | C  | 21.365737 | 17.639192 | 3.390760 |
| H  | 14.116017 | 18.242965 | 3.676989  | H  | 22.018608 | 18.244358 | 2.766562 |
| C  | 16.173935 | 17.427566 | 3.256824  | C  | 19.960956 | 17.427862 | 3.185924 |
| H  | 16.770637 | 17.852165 | 4.059853  | H  | 19.364080 | 17.853167 | 2.383407 |
| C  | 12.421300 | 14.110201 | 2.892196  | C  | 23.714553 | 14.111216 | 3.546698 |
| H  | 11.909514 | 13.176209 | 3.175076  | H  | 24.226589 | 13.177655 | 3.262850 |
| H  | 12.570002 | 14.082800 | 1.805430  | H  | 23.565848 | 14.082659 | 4.633433 |
| H  | 11.752450 | 14.948667 | 3.130707  | H  | 24.383183 | 14.950105 | 3.309060 |
| C  | 15.263976 | 12.776395 | 2.219078  | C  | 20.872206 | 12.776200 | 4.218661 |
| C  | 14.627316 | 11.363125 | 0.568080  | C  | 21.509897 | 11.362386 | 5.868864 |
| H  | 14.194267 | 11.895071 | -0.290382 | H  | 21.944390 | 11.893097 | 6.727334 |
| H  | 14.227954 | 10.343270 | 0.612711  | H  | 21.908781 | 10.342361 | 5.822418 |
| C  | 16.157091 | 11.451468 | 0.612506  | C  | 19.980008 | 11.451803 | 5.826344 |
| H  | 16.561426 | 11.738898 | -0.368298 | H  | 19.577400 | 11.740690 | 6.807451 |
| C  | 16.880828 | 10.172886 | 1.083458  | C  | 19.254430 | 10.173288 | 5.358185 |
| H  | 17.942614 | 10.459904 | 1.185535  | H  | 18.193155 | 10.461985 | 5.255609 |
| C  | 16.390217 | 9.682590  | 2.446593  | C  | 19.744045 | 9.679444  | 3.995982 |
| H  | 16.519489 | 10.452991 | 3.220466  | H  | 19.615728 | 10.448306 | 3.220434 |
| H  | 16.960954 | 8.796732  | 2.758112  | H  | 19.171995 | 8.793762  | 3.686351 |
| H  | 15.327802 | 9.394536  | 2.416155  | H  | 20.806035 | 9.389854  | 4.026805 |
| C  | 16.776494 | 9.082798  | 0.014896  | C  | 19.356465 | 9.085376  | 6.429175 |
| H  | 17.357057 | 8.197698  | 0.311488  | H  | 18.773999 | 8.200866  | 6.134605 |
| H  | 17.159245 | 9.434577  | -0.954851 | H  | 18.974410 | 9.440136  | 7.398098 |
| H  | 15.732916 | 8.760512  | -0.128102 | H  | 20.399141 | 8.760530  | 6.573122 |



Table 13: XYZ coordinates for Optimized structure B3LYP [ $1^{iPr}$ ]<sup>+</sup>

|    |           |           |           |    |           |           |          |
|----|-----------|-----------|-----------|----|-----------|-----------|----------|
| Au | 17.885047 | 13.340214 | 4.618734  | Au | 18.250784 | 13.339898 | 1.822678 |
| Fe | 15.276604 | 15.672941 | 3.233804  | Fe | 20.858839 | 15.673231 | 3.206708 |
| O  | 14.184340 | 12.028512 | 1.893984  | O  | 21.951230 | 12.028314 | 4.546752 |
| N  | 16.346449 | 12.526857 | 1.593451  | N  | 19.789358 | 12.527248 | 4.848206 |
| C  | 16.020181 | 14.041721 | 4.401373  | C  | 20.115423 | 14.041471 | 2.039737 |
| C  | 15.042274 | 13.667148 | 3.384715  | C  | 21.093305 | 13.667373 | 3.056601 |
| C  | 13.781829 | 14.349314 | 3.636101  | C  | 22.353739 | 14.349503 | 2.805044 |
| C  | 14.007767 | 15.189523 | 4.769437  | C  | 22.127826 | 15.189256 | 1.671381 |
| H  | 13.279970 | 15.871154 | 5.191037  | H  | 22.855614 | 15.870746 | 1.249544 |
| C  | 15.353476 | 15.010142 | 5.213737  | C  | 20.782177 | 15.009547 | 1.227056 |
| H  | 15.811100 | 15.541535 | 6.037808  | H  | 20.324691 | 15.540469 | 0.402614 |
| C  | 16.777228 | 16.574503 | 2.084424  | C  | 19.358011 | 16.575037 | 4.355679 |
| H  | 17.795160 | 16.211988 | 2.032109  | H  | 18.340121 | 16.212383 | 4.408156 |
| C  | 15.701309 | 16.117641 | 1.265571  | C  | 20.433820 | 16.118427 | 5.174782 |
| H  | 15.776769 | 15.375193 | 0.482601  | H  | 20.358290 | 15.376207 | 5.957956 |
| C  | 14.505260 | 16.774639 | 1.695984  | C  | 21.629898 | 16.775375 | 4.744411 |
| H  | 13.515458 | 16.627892 | 1.285942  | H  | 22.619628 | 16.628805 | 5.154696 |
| C  | 14.845734 | 17.629349 | 2.794141  | C  | 21.289522 | 17.629814 | 3.646003 |
| H  | 14.159082 | 18.243245 | 3.360733  | H  | 21.976240 | 18.243673 | 3.079445 |
| C  | 16.251070 | 17.502032 | 3.032365  | C  | 19.884215 | 17.502376 | 3.407504 |
| H  | 16.803023 | 18.004374 | 3.814356  | H  | 19.332304 | 18.004355 | 2.625139 |
| C  | 12.478676 | 14.211917 | 2.907345  | C  | 23.656813 | 14.212468 | 3.534026 |
| H  | 11.944158 | 13.322829 | 3.261676  | H  | 24.191536 | 13.323399 | 3.179965 |
| H  | 12.620895 | 14.104596 | 1.830262  | H  | 23.514449 | 14.105330 | 4.611113 |
| H  | 11.851722 | 15.087162 | 3.097444  | H  | 24.283652 | 15.087780 | 3.343895 |
| C  | 15.259465 | 12.750436 | 2.270634  | C  | 20.876194 | 12.750683 | 4.170725 |
| C  | 14.571783 | 11.285480 | 0.683711  | C  | 21.563947 | 11.284878 | 5.756841 |
| H  | 14.105495 | 11.789956 | -0.165075 | H  | 22.030594 | 11.788933 | 6.605673 |
| H  | 14.177832 | 10.275288 | 0.790189  | H  | 21.957572 | 10.274625 | 5.649865 |
| C  | 16.103358 | 11.379091 | 0.675491  | C  | 20.032387 | 11.378991 | 5.765566 |
| H  | 16.477210 | 11.642464 | -0.316438 | H  | 19.659220 | 11.641834 | 6.757903 |
| C  | 16.840827 | 10.121785 | 1.179790  | C  | 19.294378 | 10.122236 | 5.260849 |
| H  | 17.899511 | 10.406730 | 1.249449  | H  | 18.235768 | 10.407571 | 5.191632 |
| C  | 16.365854 | 9.686220  | 2.570351  | C  | 19.768783 | 9.687451  | 3.869862 |
| H  | 16.517422 | 10.480445 | 3.308891  | H  | 19.617380 | 10.482204 | 3.131866 |
| H  | 16.927332 | 8.807753  | 2.900298  | H  | 19.206890 | 8.809379  | 3.539562 |
| H  | 15.303833 | 9.415179  | 2.563764  | H  | 20.830695 | 9.415956  | 3.876007 |
| C  | 16.709561 | 8.990528  | 0.152638  | C  | 19.425530 | 8.990388  | 6.287340 |
| H  | 17.291744 | 8.120655  | 0.472399  | H  | 18.843060 | 8.120824  | 5.967232 |
| H  | 17.073085 | 9.306258  | -0.831313 | H  | 19.062287 | 9.305644  | 7.271545 |
| H  | 15.665777 | 8.671526  | 0.045679  | H  | 20.469241 | 8.671010  | 6.393899 |

Table 14: XYZ coordinates for Optimized structure B3LYP [ $1^{iPr}$ ] $^{2+}$  S1

|    |           |           |           |    |           |           |          |
|----|-----------|-----------|-----------|----|-----------|-----------|----------|
| Au | 17.884138 | 13.324285 | 4.625188  | Au | 18.253472 | 13.323814 | 1.817575 |
| Fe | 15.275680 | 15.679908 | 3.232777  | Fe | 20.859828 | 15.679160 | 3.207541 |
| O  | 14.191875 | 12.013199 | 1.900807  | O  | 21.944690 | 12.011116 | 4.541538 |
| N  | 16.349685 | 12.519366 | 1.590987  | N  | 19.787267 | 12.518266 | 4.852576 |
| C  | 16.014518 | 14.005701 | 4.421295  | C  | 20.123667 | 14.003494 | 2.021000 |
| C  | 15.048374 | 13.651689 | 3.389293  | C  | 21.088803 | 13.650855 | 3.054417 |
| C  | 13.786565 | 14.330557 | 3.639391  | C  | 22.350544 | 14.329964 | 2.805225 |
| C  | 14.012143 | 15.168269 | 4.777314  | C  | 22.126275 | 15.165912 | 1.665735 |
| H  | 13.285158 | 15.848904 | 5.201418  | H  | 22.853544 | 15.846335 | 1.241773 |
| C  | 15.351744 | 14.975858 | 5.230880  | C  | 20.787385 | 14.972368 | 1.210593 |
| H  | 15.807264 | 15.502379 | 6.059069  | H  | 20.332634 | 15.497883 | 0.381352 |
| C  | 16.745390 | 16.656516 | 2.024840  | C  | 19.386082 | 16.657210 | 4.408782 |
| H  | 17.770078 | 16.320486 | 1.937245  | H  | 18.361461 | 16.320042 | 4.492635 |
| C  | 15.662862 | 16.173390 | 1.236148  | C  | 20.466297 | 16.176162 | 5.201959 |
| H  | 15.736876 | 15.442520 | 0.442321  | H  | 20.390361 | 15.446722 | 5.996920 |
| C  | 14.462410 | 16.792463 | 1.707499  | C  | 21.667934 | 16.795014 | 4.733294 |
| H  | 13.466844 | 16.626394 | 1.319960  | H  | 22.662310 | 16.630230 | 5.124433 |
| C  | 14.811893 | 17.645317 | 2.805110  | C  | 21.321534 | 17.645554 | 3.632931 |
| H  | 14.128246 | 18.238290 | 3.396604  | H  | 22.006780 | 18.237672 | 3.042431 |
| C  | 16.227294 | 17.555052 | 2.997459  | C  | 19.906856 | 17.554049 | 3.436057 |
| H  | 16.787278 | 18.066468 | 3.768073  | H  | 19.349623 | 18.062640 | 2.661611 |
| C  | 12.484289 | 14.189622 | 2.914130  | C  | 23.651544 | 14.190801 | 3.533135 |
| H  | 11.964439 | 13.296188 | 3.278115  | H  | 24.173012 | 13.297612 | 3.170893 |
| H  | 12.621788 | 14.076818 | 1.837521  | H  | 23.511776 | 14.078705 | 4.609541 |
| H  | 11.851604 | 15.058674 | 3.109324  | H  | 24.283812 | 15.060307 | 3.338649 |
| C  | 15.263830 | 12.730187 | 2.270598  | C  | 20.873065 | 12.729127 | 4.172847 |
| C  | 14.575208 | 11.271448 | 0.682679  | C  | 21.561234 | 11.267951 | 5.758715 |
| H  | 14.095478 | 11.776011 | -0.157636 | H  | 22.041339 | 11.771118 | 6.599650 |
| H  | 14.188909 | 10.259399 | 0.794427  | H  | 21.946941 | 10.255835 | 5.645540 |
| C  | 16.106465 | 11.375476 | 0.662597  | C  | 20.030032 | 11.372768 | 5.779180 |
| H  | 16.471029 | 11.653238 | -0.328460 | H  | 19.666174 | 11.648791 | 6.770987 |
| C  | 16.855582 | 10.119965 | 1.153338  | C  | 19.280261 | 10.118409 | 5.286500 |
| H  | 17.913556 | 10.409230 | 1.219496  | H  | 18.222485 | 10.408407 | 5.220427 |
| C  | 16.387541 | 9.667028  | 2.540646  | C  | 19.748375 | 9.667162  | 3.898673 |
| H  | 16.536882 | 10.451141 | 3.290673  | H  | 19.600179 | 10.452519 | 3.149729 |
| H  | 16.953993 | 8.787459  | 2.857848  | H  | 19.181100 | 8.788670  | 3.579955 |
| H  | 15.327314 | 9.389806  | 2.534916  | H  | 20.808298 | 9.388773  | 3.904449 |
| C  | 16.725347 | 8.999264  | 0.114381  | C  | 19.409550 | 8.996170  | 6.323911 |
| H  | 17.312181 | 8.129265  | 0.424267  | H  | 18.822366 | 8.126940  | 6.012547 |
| H  | 17.084713 | 9.326767  | -0.867010 | H  | 19.050031 | 9.322435  | 7.305657 |
| H  | 15.682679 | 8.677059  | 0.008167  | H  | 20.452021 | 8.673289  | 6.429989 |

Table 15: XYZ coordinates for Optimized structure B3LYP 2Cl

|    |           |           |           |   |           |           |           |
|----|-----------|-----------|-----------|---|-----------|-----------|-----------|
| Au | 9.582459  | 17.008351 | 2.618134  | H | 8.056190  | 14.935891 | 4.910927  |
| Cl | 11.621207 | 17.695235 | 3.757048  | C | 5.500617  | 12.639341 | 4.265373  |
| Fe | 7.104220  | 19.832177 | 2.956305  | H | 4.903948  | 12.795845 | 5.172293  |
| Au | 7.440216  | 16.323553 | 1.428339  | H | 6.102128  | 11.736959 | 4.415012  |
| Cl | 5.394989  | 15.694134 | 0.266760  | H | 4.813823  | 12.461001 | 3.430714  |
| Fe | 9.825527  | 17.673566 | -1.164854 | C | 8.486709  | 16.394038 | -0.299889 |
| O  | 5.578913  | 16.890111 | 5.228161  | C | 9.755357  | 15.744509 | -0.596044 |
| N  | 6.415418  | 16.220786 | 3.266294  | C | 10.013552 | 15.831456 | -2.021083 |
| C  | 8.501836  | 18.454792 | 3.528135  | C | 8.903838  | 16.532964 | -2.587457 |
| O  | 11.494123 | 14.216337 | 0.015182  | H | 8.809164  | 16.796375 | -3.633407 |
| N  | 10.644340 | 15.455002 | 1.670527  | C | 7.983190  | 16.875267 | -1.549400 |
| C  | 7.250299  | 18.302325 | 4.255635  | H | 7.053052  | 17.410023 | -1.680026 |
| C  | 6.961421  | 19.531994 | 4.969123  | C | 10.107032 | 19.293357 | 0.063595  |
| C  | 8.035590  | 20.428423 | 4.674072  | H | 9.603353  | 19.447892 | 1.008124  |
| H  | 8.100663  | 21.450422 | 5.025666  | C | 11.335377 | 18.586783 | -0.125638 |
| C  | 8.964485  | 19.780302 | 3.802551  | H | 11.916775 | 18.116432 | 0.656743  |
| H  | 9.873482  | 20.214691 | 3.411083  | C | 11.625047 | 18.564973 | -1.527634 |
| C  | 6.792064  | 19.688663 | 0.932602  | H | 12.470970 | 18.078703 | -1.994800 |
| H  | 7.309137  | 19.004055 | 0.274068  | C | 10.571544 | 19.258870 | -2.206571 |
| C  | 5.585215  | 19.413394 | 1.648011  | H | 10.481642 | 19.389216 | -3.276714 |
| H  | 5.036264  | 18.481118 | 1.618980  | C | 9.630015  | 19.705364 | -1.223120 |
| C  | 5.268079  | 20.560401 | 2.444038  | H | 8.711869  | 20.240336 | -1.423935 |
| H  | 4.430061  | 20.651797 | 3.122027  | C | 11.178093 | 15.282108 | -2.789006 |
| C  | 6.282980  | 21.546538 | 2.220866  | H | 11.285398 | 15.816520 | -3.737277 |
| H  | 6.346831  | 22.514043 | 2.700576  | H | 11.021552 | 14.219173 | -3.011792 |
| C  | 7.228430  | 21.005819 | 1.289836  | H | 12.111254 | 15.368961 | -2.228421 |
| H  | 8.123526  | 21.500579 | 0.938352  | C | 10.626505 | 15.170975 | 0.402502  |
| C  | 5.801019  | 19.831697 | 5.869823  | C | 12.314231 | 13.886387 | 1.196740  |
| H  | 5.656181  | 20.913155 | 5.945123  | H | 13.298266 | 14.330272 | 1.034948  |
| H  | 5.989205  | 19.441383 | 6.877806  | H | 12.388205 | 12.799972 | 1.237742  |
| H  | 4.877045  | 19.377333 | 5.506111  | C | 11.553841 | 14.520663 | 2.372438  |
| C  | 6.419036  | 17.122941 | 4.201569  | H | 12.224673 | 15.105664 | 3.005489  |
| C  | 4.794553  | 15.692857 | 4.868825  | C | 10.749810 | 13.544991 | 3.254102  |
| H  | 3.791807  | 16.036275 | 4.607772  | H | 10.170815 | 14.177636 | 3.939301  |
| H  | 4.762061  | 15.058112 | 5.754031  | C | 9.770819  | 12.690979 | 2.441650  |
| C  | 5.552999  | 15.088936 | 3.675699  | H | 9.083547  | 13.315787 | 1.861713  |
| H  | 4.873129  | 14.860708 | 2.851826  | H | 9.173693  | 12.062224 | 3.109216  |
| C  | 6.407140  | 13.843887 | 3.985821  | H | 10.300446 | 12.026468 | 1.749031  |
| H  | 6.974901  | 13.641435 | 3.068415  | C | 11.703003 | 12.680569 | 4.087810  |
| C  | 7.402012  | 14.084462 | 5.126066  | H | 12.311431 | 12.031805 | 3.466022  |
| H  | 8.032718  | 13.201700 | 5.269776  | H | 11.136164 | 12.037300 | 4.768476  |
| H  | 6.884402  | 14.277804 | 6.072963  | H | 12.379034 | 13.302638 | 4.684514  |

Table 16: XYZ coordinates for Optimized structure B3LYP [2Cl]<sup>+</sup>

|    |           |           |           |   |           |           |           |
|----|-----------|-----------|-----------|---|-----------|-----------|-----------|
| Au | 9.598324  | 16.998374 | 2.612305  | H | 8.063966  | 14.910660 | 4.897536  |
| Cl | 11.631610 | 17.709955 | 3.714934  | C | 5.492325  | 12.636605 | 4.226059  |
| Fe | 7.098253  | 19.826502 | 2.942132  | H | 4.897994  | 12.787431 | 5.135205  |
| Au | 7.446973  | 16.322837 | 1.430480  | H | 6.090491  | 11.730858 | 4.366081  |
| Cl | 5.405143  | 15.757412 | 0.266703  | H | 4.804682  | 12.470639 | 3.389926  |
| Fe | 9.826432  | 17.687789 | -1.155639 | C | 8.486953  | 16.379126 | -0.299491 |
| O  | 5.607712  | 16.883899 | 5.231024  | C | 9.752098  | 15.728861 | -0.597248 |
| N  | 6.424095  | 16.222981 | 3.260055  | C | 9.999195  | 15.788040 | -2.019849 |
| C  | 8.526892  | 18.443825 | 3.531936  | C | 8.903159  | 16.498701 | -2.587151 |
| O  | 11.472253 | 14.184328 | 0.018087  | H | 8.813496  | 16.760143 | -3.633721 |
| N  | 10.653741 | 15.451248 | 1.665373  | C | 7.988429  | 16.861303 | -1.552638 |
| C  | 7.268116  | 18.299796 | 4.248464  | H | 7.062863  | 17.401168 | -1.692728 |
| C  | 6.994858  | 19.520227 | 4.982243  | C | 10.090669 | 19.325171 | 0.056374  |
| C  | 8.070547  | 20.409526 | 4.687040  | H | 9.574145  | 19.482980 | 0.992864  |
| H  | 8.140428  | 21.431598 | 5.036660  | C | 11.338622 | 18.646809 | -0.105589 |
| C  | 8.992066  | 19.763168 | 3.815000  | H | 11.915592 | 18.187718 | 0.686599  |
| H  | 9.895299  | 20.204094 | 3.417412  | C | 11.657247 | 18.632521 | -1.495584 |
| C  | 6.728534  | 19.700906 | 0.916759  | H | 12.514972 | 18.149541 | -1.944001 |
| H  | 7.222675  | 19.019860 | 0.238648  | C | 10.609024 | 19.296353 | -2.198994 |
| C  | 5.543683  | 19.419250 | 1.670806  | H | 10.537964 | 19.410324 | -3.272121 |
| H  | 4.993396  | 18.487810 | 1.659317  | C | 9.634656  | 19.725851 | -1.242851 |
| C  | 5.237636  | 20.577256 | 2.453963  | H | 8.714975  | 20.246543 | -1.470918 |
| H  | 4.421953  | 20.670814 | 3.157928  | C | 11.168434 | 15.243242 | -2.779922 |
| C  | 6.232440  | 21.565519 | 2.188717  | H | 11.260848 | 15.752705 | -3.742064 |
| H  | 6.309277  | 22.533418 | 2.665276  | H | 11.016278 | 14.174017 | -2.969307 |
| C  | 7.153454  | 21.026494 | 1.242085  | H | 12.101825 | 15.351206 | -2.224398 |
| H  | 8.035661  | 21.528305 | 0.868934  | C | 10.625687 | 15.146354 | 0.403702  |
| C  | 5.841574  | 19.817746 | 5.889992  | C | 12.302646 | 13.854352 | 1.199041  |
| H  | 5.710227  | 20.898273 | 5.987542  | H | 13.288632 | 14.283855 | 1.016979  |
| H  | 6.041068  | 19.404437 | 6.885755  | H | 12.358412 | 12.767953 | 1.249794  |
| H  | 4.912494  | 19.374573 | 5.527196  | C | 11.561413 | 14.513314 | 2.373657  |
| C  | 6.434042  | 17.113993 | 4.203652  | H | 12.243876 | 15.100581 | 2.991052  |
| C  | 4.812944  | 15.686609 | 4.873476  | C | 10.750342 | 13.558681 | 3.271354  |
| H  | 3.809892  | 16.039305 | 4.629848  | H | 10.179175 | 14.204864 | 3.950813  |
| H  | 4.793163  | 15.048218 | 5.755616  | C | 9.764926  | 12.698720 | 2.472978  |
| C  | 5.555707  | 15.089299 | 3.666749  | H | 9.076862  | 13.315630 | 1.885146  |
| H  | 4.867266  | 14.876915 | 2.846398  | H | 9.167941  | 12.082165 | 3.151215  |
| C  | 6.406439  | 13.838264 | 3.958252  | H | 10.289564 | 12.021825 | 1.789053  |
| H  | 6.969688  | 13.641956 | 3.036563  | C | 11.701920 | 12.700171 | 4.113335  |
| C  | 7.403390  | 14.060833 | 5.100237  | H | 12.303825 | 12.039414 | 3.478061  |
| H  | 8.028692  | 13.173101 | 5.232687  | H | 11.131480 | 12.070084 | 4.802772  |
| H  | 6.887716  | 14.244603 | 6.049728  | H | 12.382597 | 13.326184 | 4.700048  |

Table 17: XYZ coordinates for Optimized structure B3LYP [2Cl]<sup>2+</sup> S1

|    |           |           |           |   |           |           |           |
|----|-----------|-----------|-----------|---|-----------|-----------|-----------|
| Au | 9.602193  | 16.974531 | 2.629732  | H | 8.081453  | 14.882389 | 4.914633  |
| Cl | 11.633372 | 17.707011 | 3.683425  | C | 5.495580  | 12.616738 | 4.258332  |
| Fe | 7.074899  | 19.819701 | 2.903501  | H | 4.908373  | 12.771756 | 5.171047  |
| Au | 7.437707  | 16.290122 | 1.455158  | H | 6.091432  | 11.709511 | 4.396395  |
| Cl | 5.399195  | 15.748717 | 0.307616  | H | 4.802674  | 12.452049 | 3.426629  |
| Fe | 9.853619  | 17.711531 | -1.127176 | C | 8.447484  | 16.324041 | -0.288805 |
| O  | 5.632460  | 16.875809 | 5.254608  | C | 9.746758  | 15.747306 | -0.578733 |
| N  | 6.432968  | 16.199854 | 3.284284  | C | 10.009442 | 15.848283 | -2.002046 |
| C  | 8.555510  | 18.413810 | 3.575596  | C | 8.890038  | 16.547121 | -2.556058 |
| O  | 11.455263 | 14.184723 | 0.017742  | H | 8.787632  | 16.833797 | -3.594629 |
| N  | 10.645054 | 15.434444 | 1.679595  | C | 7.951588  | 16.826126 | -1.520919 |
| C  | 7.275022  | 18.290526 | 4.245197  | H | 7.016825  | 17.353639 | -1.650311 |
| C  | 6.977831  | 19.526684 | 4.944006  | C | 10.217605 | 19.433718 | 0.046911  |
| C  | 8.055009  | 20.417278 | 4.635032  | H | 9.727737  | 19.646884 | 0.986599  |
| H  | 8.124147  | 21.446919 | 4.961018  | C | 11.395634 | 18.638618 | -0.118375 |
| C  | 9.003189  | 19.739941 | 3.814418  | H | 11.966672 | 18.176408 | 0.676002  |
| H  | 9.912945  | 20.173440 | 3.422861  | C | 11.678593 | 18.570815 | -1.522762 |
| C  | 6.646277  | 19.758664 | 0.827561  | H | 12.498528 | 18.036246 | -1.982019 |
| H  | 7.134873  | 19.103779 | 0.119805  | C | 10.667199 | 19.312634 | -2.209429 |
| C  | 5.504329  | 19.425201 | 1.621409  | H | 10.569558 | 19.415827 | -3.281470 |
| H  | 4.963708  | 18.488368 | 1.593640  | C | 9.769833  | 19.843060 | -1.237754 |
| C  | 5.210726  | 20.555194 | 2.454290  | H | 8.875822  | 20.411103 | -1.456830 |
| H  | 4.410020  | 20.622143 | 3.177622  | C | 11.171404 | 15.306813 | -2.771864 |
| C  | 6.182363  | 21.567704 | 2.176683  | H | 11.282187 | 15.846077 | -3.715277 |
| H  | 6.264393  | 22.525941 | 2.671163  | H | 10.985759 | 14.250652 | -2.998995 |
| C  | 7.064288  | 21.071509 | 1.172713  | H | 12.102097 | 15.367126 | -2.205905 |
| H  | 7.929369  | 21.593596 | 0.786929  | C | 10.618534 | 15.139294 | 0.417377  |
| C  | 5.824422  | 19.828943 | 5.846356  | C | 12.283441 | 13.827992 | 1.198231  |
| H  | 5.674991  | 20.908630 | 5.917520  | H | 13.274584 | 14.243260 | 1.014710  |
| H  | 6.048181  | 19.445825 | 6.848672  | H | 12.318280 | 12.740594 | 1.235473  |
| H  | 4.902443  | 19.354707 | 5.506999  | C | 11.553655 | 14.487172 | 2.381566  |
| C  | 6.445473  | 17.093128 | 4.223749  | H | 12.243403 | 15.070799 | 2.994021  |
| C  | 4.836897  | 15.667247 | 4.917819  | C | 10.741657 | 13.534536 | 3.279363  |
| H  | 3.829278  | 16.016608 | 4.691701  | H | 10.181336 | 14.180133 | 3.968429  |
| H  | 4.839917  | 15.036413 | 5.805012  | C | 9.745615  | 12.685651 | 2.482630  |
| C  | 5.562980  | 15.066239 | 3.701354  | H | 9.055843  | 13.307525 | 1.901656  |
| H  | 4.864600  | 14.860046 | 2.888188  | H | 9.149943  | 12.069137 | 3.161662  |
| C  | 6.413855  | 13.813764 | 3.983202  | H | 10.260770 | 12.008721 | 1.792096  |
| H  | 6.966742  | 13.614742 | 3.055711  | C | 11.695617 | 12.665645 | 4.108089  |
| C  | 7.420032  | 14.033025 | 5.117592  | H | 12.287828 | 12.004836 | 3.464164  |
| H  | 8.044650  | 13.144162 | 5.243145  | H | 11.126186 | 12.035153 | 4.797510  |
| H  | 6.911945  | 14.214374 | 6.071193  | H | 12.384221 | 13.283803 | 4.693420  |

Table 18: XYZ coordinates for Optimized structure B3LYP 2Br

|    |           |           |           |   |           |           |           |
|----|-----------|-----------|-----------|---|-----------|-----------|-----------|
| Au | 9.641184  | 17.010754 | 2.577933  | H | 8.159944  | 14.936687 | 4.894660  |
| Br | 11.773565 | 17.784940 | 3.783721  | C | 5.652649  | 12.578314 | 4.283505  |
| Fe | 7.102336  | 19.789315 | 2.878897  | H | 5.053367  | 12.733419 | 5.189023  |
| Au | 7.505706  | 16.271980 | 1.384608  | H | 6.273469  | 11.691193 | 4.444986  |
| Br | 5.379485  | 15.527588 | 0.149481  | H | 4.969480  | 12.373765 | 3.451966  |
| Fe | 9.887225  | 17.654778 | -1.199017 | C | 8.558126  | 16.361121 | -0.342025 |
| O  | 5.648166  | 16.840890 | 5.187978  | C | 9.837131  | 15.726979 | -0.626769 |
| N  | 6.488124  | 16.163793 | 3.229610  | C | 10.106469 | 15.813522 | -2.049661 |
| C  | 8.531319  | 18.450911 | 3.466919  | C | 8.993312  | 16.500567 | -2.626981 |
| O  | 11.580898 | 14.213602 | -0.002373 | H | 8.904623  | 16.761754 | -3.673974 |
| N  | 10.720217 | 15.455592 | 1.645604  | C | 8.060042  | 16.833776 | -1.597334 |
| C  | 7.281798  | 18.276173 | 4.193109  | H | 7.123754  | 17.355116 | -1.737615 |
| C  | 6.961211  | 19.505416 | 4.893845  | C | 10.135682 | 19.284187 | 0.022457  |
| C  | 8.013502  | 20.425023 | 4.591643  | H | 9.621400  | 19.437223 | 0.961500  |
| H  | 8.052617  | 21.452062 | 4.932124  | C | 11.375199 | 18.593003 | -0.151326 |
| C  | 8.959621  | 19.790909 | 3.728587  | H | 11.955967 | 18.136651 | 0.639830  |
| H  | 9.858691  | 20.243671 | 3.335269  | C | 11.678026 | 18.566950 | -1.550416 |
| C  | 6.792243  | 19.617049 | 0.858053  | H | 12.535188 | 18.090111 | -2.006618 |
| H  | 7.320784  | 18.934179 | 0.206959  | C | 10.621766 | 19.242827 | -2.243244 |
| C  | 5.590531  | 19.328839 | 1.577392  | H | 10.539751 | 19.364822 | -3.314967 |
| H  | 5.057642  | 18.387015 | 1.558163  | C | 9.665089  | 19.682323 | -1.271122 |
| C  | 5.253783  | 20.479116 | 2.360545  | H | 8.741569  | 20.203143 | -1.483929 |
| H  | 4.414463  | 20.563782 | 3.037753  | C | 11.284761 | 15.276344 | -2.804887 |
| C  | 6.251262  | 21.480312 | 2.125656  | H | 11.398330 | 15.812711 | -3.751291 |
| H  | 6.298952  | 22.453663 | 2.595236  | H | 11.140890 | 14.212189 | -3.029868 |
| C  | 7.205655  | 20.945717 | 1.200126  | H | 12.210322 | 15.370642 | -2.233113 |
| H  | 8.091984  | 21.452427 | 0.843740  | C | 10.707495 | 15.165130 | 0.378435  |
| C  | 5.791549  | 19.785060 | 5.788827  | C | 12.399637 | 13.894075 | 1.181340  |
| H  | 5.619156  | 20.863217 | 5.852667  | H | 13.380906 | 14.345115 | 1.021740  |
| H  | 5.987041  | 19.409373 | 6.800948  | H | 12.482886 | 12.808355 | 1.225748  |
| H  | 4.880335  | 19.303239 | 5.428229  | C | 11.630921 | 14.525928 | 2.352533  |
| C  | 6.477837  | 17.077911 | 4.154134  | H | 12.296474 | 15.114901 | 2.987968  |
| C  | 4.885279  | 15.626250 | 4.847289  | C | 10.828558 | 13.548079 | 3.232519  |
| H  | 3.875784  | 15.947308 | 4.583288  | H | 10.242866 | 14.179787 | 3.912745  |
| H  | 4.864721  | 15.003329 | 5.741284  | C | 9.858427  | 12.686145 | 2.418008  |
| C  | 5.652123  | 15.020022 | 3.661472  | H | 9.169415  | 13.305145 | 1.833811  |
| H  | 4.973896  | 14.763590 | 2.844252  | H | 9.263004  | 12.054347 | 3.084285  |
| C  | 6.532799  | 13.798265 | 3.986893  | H | 10.394845 | 12.023543 | 1.728659  |
| H  | 7.102908  | 13.596122 | 3.070991  | C | 11.782076 | 12.691792 | 4.074249  |
| C  | 7.524046  | 14.074592 | 5.122054  | H | 12.398434 | 12.044477 | 3.438466  |
| H  | 8.173071  | 13.207198 | 5.277149  | H | 11.215062 | 12.046966 | 4.753327  |
| H  | 7.004340  | 14.269990 | 6.067414  | H | 12.450724 | 13.319458 | 4.673410  |

Table 19: XYZ coordinates for Optimized structure B3LYP 2I

|    |           |           |           |   |           |           |           |
|----|-----------|-----------|-----------|---|-----------|-----------|-----------|
| Au | 9.649871  | 17.017596 | 2.585171  | H | 8.188522  | 14.993044 | 4.937807  |
| I  | 11.908491 | 17.828405 | 3.915097  | C | 5.742157  | 12.568340 | 4.338277  |
| Fe | 7.092461  | 19.790808 | 2.860160  | H | 5.136829  | 12.719090 | 5.240445  |
| Au | 7.500499  | 16.268651 | 1.379671  | H | 6.383231  | 11.697702 | 4.509851  |
| I  | 5.249386  | 15.426917 | 0.054687  | H | 5.066443  | 12.340427 | 3.506760  |
| Fe | 9.896531  | 17.674314 | -1.193192 | C | 8.558887  | 16.374046 | -0.347008 |
| O  | 5.671954  | 16.838777 | 5.199561  | C | 9.841565  | 15.743895 | -0.624838 |
| N  | 6.496665  | 16.156364 | 3.235710  | C | 10.122295 | 15.834922 | -2.045421 |
| C  | 8.531370  | 18.464551 | 3.460788  | C | 9.013824  | 16.523163 | -2.629299 |
| O  | 11.560058 | 14.204013 | -0.002596 | H | 8.932659  | 16.787710 | -3.676046 |
| N  | 10.716395 | 15.450959 | 1.651457  | C | 8.073375  | 16.852619 | -1.605389 |
| C  | 7.279406  | 18.284314 | 4.181968  | H | 7.140234  | 17.377935 | -1.752312 |
| C  | 6.945109  | 19.514127 | 4.875705  | C | 10.149063 | 19.300650 | 0.032781  |
| C  | 7.990374  | 20.441141 | 4.573662  | H | 9.637886  | 19.449511 | 0.974158  |
| H  | 8.019564  | 21.470158 | 4.909109  | C | 11.388912 | 18.612214 | -0.149604 |
| C  | 8.944536  | 19.810709 | 3.717292  | H | 11.975242 | 18.153641 | 0.635963  |
| H  | 9.839637  | 20.271478 | 3.323962  | C | 11.684944 | 18.591193 | -1.549879 |
| C  | 6.791544  | 19.613116 | 0.838037  | H | 12.540100 | 18.116201 | -2.011780 |
| H  | 7.326584  | 18.930291 | 0.192172  | C | 10.624484 | 19.267669 | -2.235156 |
| C  | 5.586865  | 19.323926 | 1.551992  | H | 10.537358 | 19.393696 | -3.306035 |
| H  | 5.055086  | 18.381530 | 1.532929  | C | 9.671923  | 19.702361 | -1.257080 |
| C  | 5.243437  | 20.474813 | 2.330831  | H | 8.746868  | 20.222769 | -1.464023 |
| H  | 4.400755  | 20.558547 | 3.003983  | C | 11.307177 | 15.302108 | -2.793642 |
| C  | 6.239377  | 21.477791 | 2.098570  | H | 11.425512 | 15.840752 | -3.738161 |
| H  | 6.282014  | 22.452685 | 2.565496  | H | 11.167672 | 14.238156 | -3.022242 |
| C  | 7.199664  | 20.943508 | 1.179132  | H | 12.228849 | 15.398302 | -2.215878 |
| H  | 8.086307  | 21.451655 | 0.825510  | C | 10.701919 | 15.168445 | 0.381877  |
| C  | 5.768703  | 19.789459 | 5.763360  | C | 12.369950 | 13.863051 | 1.182091  |
| H  | 5.589336  | 20.866775 | 5.821928  | H | 13.355632 | 14.308183 | 1.032860  |
| H  | 5.960942  | 19.419407 | 6.778133  | H | 12.442741 | 12.776327 | 1.214769  |
| H  | 4.862303  | 19.301133 | 5.399323  | C | 11.599099 | 14.488862 | 2.353059  |
| C  | 6.487029  | 17.077484 | 4.154070  | H | 12.269379 | 15.051002 | 3.007933  |
| C  | 4.917649  | 15.613371 | 4.875722  | C | 10.764258 | 13.513574 | 3.204157  |
| H  | 3.905345  | 15.924017 | 4.610664  | H | 10.172398 | 14.147051 | 3.877170  |
| H  | 4.905841  | 15.000296 | 5.776478  | C | 9.801716  | 12.672181 | 2.359553  |
| C  | 5.686698  | 15.003151 | 3.695246  | H | 9.137027  | 13.305075 | 1.761938  |
| H  | 5.005687  | 14.718614 | 2.889397  | H | 9.179855  | 12.045713 | 3.006444  |
| C  | 6.594573  | 13.805614 | 4.032338  | H | 10.345924 | 12.005898 | 1.680141  |
| H  | 7.169995  | 13.609746 | 3.118536  | C | 11.687502 | 12.635742 | 4.057315  |
| C  | 7.576794  | 14.114007 | 5.167143  | H | 12.310002 | 11.988796 | 3.427246  |
| H  | 8.250211  | 13.265980 | 5.325190  | H | 11.097277 | 11.989962 | 4.715408  |
| H  | 7.050381  | 14.297171 | 6.111112  | H | 12.349770 | 13.248198 | 4.678770  |

Table 20: XYZ coordinates for Optimized structure B3LYP 2OAc

|    |           |           |           |   |           |           |           |
|----|-----------|-----------|-----------|---|-----------|-----------|-----------|
| Au | 9.692458  | 16.919447 | 2.548196  | C | 9.967742  | 15.551994 | -0.689493 |
| O  | 11.357727 | 17.272801 | 3.892034  | C | 10.200430 | 15.521520 | -2.122831 |
| Fe | 7.293656  | 19.789667 | 3.010209  | C | 9.037591  | 16.091771 | -2.729943 |
| Au | 7.616162  | 16.166664 | 1.284772  | H | 8.912141  | 16.248127 | -3.794149 |
| O  | 5.138757  | 17.165194 | -0.222720 | C | 8.112664  | 16.475519 | -1.709524 |
| Fe | 9.902184  | 17.417440 | -1.439895 | H | 7.154948  | 16.953116 | -1.861974 |
| O  | 5.564766  | 16.754578 | 4.998171  | C | 10.206925 | 19.079910 | -0.285539 |
| N  | 6.492229  | 16.128046 | 3.062119  | H | 9.833462  | 19.213195 | 0.720035  |
| C  | 8.602330  | 18.310752 | 3.509394  | C | 11.454502 | 18.469236 | -0.624475 |
| O  | 11.809150 | 14.196687 | 0.007242  | H | 12.161586 | 18.074537 | 0.090975  |
| N  | 10.854775 | 15.444910 | 1.598596  | C | 11.562665 | 18.435408 | -2.050644 |
| C  | 7.321957  | 18.152017 | 4.180494  | H | 12.376969 | 18.004391 | -2.618040 |
| C  | 7.055021  | 19.333407 | 4.981860  | C | 10.376834 | 19.026471 | -2.596916 |
| C  | 8.178032  | 20.201016 | 4.803357  | H | 10.140100 | 19.123626 | -3.648180 |
| H  | 8.270130  | 21.187580 | 5.240342  | C | 9.536592  | 19.422736 | -1.504779 |
| C  | 9.111409  | 19.586966 | 3.911432  | H | 8.559627  | 19.878041 | -1.592449 |
| H  | 10.043720 | 20.013494 | 3.569206  | C | 11.387445 | 14.977048 | -2.859912 |
| C  | 6.949430  | 19.699866 | 0.994477  | H | 11.434566 | 15.410958 | -3.862859 |
| H  | 7.334607  | 18.935536 | 0.334330  | H | 11.309677 | 13.887337 | -2.962447 |
| C  | 5.718106  | 19.617699 | 1.716518  | H | 12.322521 | 15.194226 | -2.339083 |
| H  | 5.037083  | 18.779762 | 1.678395  | C | 10.870853 | 15.105378 | 0.343278  |
| C  | 5.588735  | 20.797623 | 2.514925  | C | 12.629237 | 13.967517 | 1.210134  |
| H  | 4.780860  | 21.018011 | 3.200183  | H | 13.586399 | 14.465847 | 1.044944  |
| C  | 6.744819  | 21.613445 | 2.287086  | H | 12.771455 | 12.890390 | 1.296727  |
| H  | 6.961874  | 22.559092 | 2.765885  | C | 11.812155 | 14.598442 | 2.348125  |
| C  | 7.588180  | 20.932834 | 1.348249  | H | 12.435850 | 15.242634 | 2.970342  |
| H  | 8.547833  | 21.281987 | 0.992498  | C | 11.054713 | 13.610368 | 3.258726  |
| C  | 5.872340  | 19.611728 | 5.860839  | H | 10.439116 | 14.233979 | 3.920505  |
| H  | 5.780482  | 20.688080 | 6.032486  | C | 10.124809 | 12.681950 | 2.470475  |
| H  | 5.991804  | 19.119443 | 6.834190  | H | 9.401278  | 13.253431 | 1.879904  |
| H  | 4.943361  | 19.246682 | 5.417428  | H | 9.566674  | 12.036331 | 3.155436  |
| C  | 6.465214  | 17.001384 | 4.025128  | H | 10.690380 | 12.033227 | 1.791195  |
| C  | 4.785891  | 15.578980 | 4.571360  | C | 12.046586 | 12.824785 | 4.124712  |
| H  | 3.796276  | 15.938043 | 4.282795  | H | 12.688729 | 12.183919 | 3.508310  |
| H  | 4.712980  | 14.916621 | 5.433979  | H | 11.509713 | 12.179635 | 4.827507  |
| C  | 5.584890  | 15.004101 | 3.390679  | H | 12.689228 | 13.500565 | 4.699815  |
| H  | 4.937233  | 14.816093 | 2.532471  | C | 12.186489 | 18.203310 | 3.509484  |
| C  | 6.397668  | 13.727366 | 3.687330  | C | 13.338907 | 18.423281 | 4.479861  |
| H  | 6.987346  | 13.537489 | 2.780664  | H | 12.949803 | 18.877151 | 5.397949  |
| C  | 7.365697  | 13.909551 | 4.860962  | H | 14.085663 | 19.085518 | 4.038956  |
| H  | 7.960158  | 13.002180 | 5.004944  | H | 13.796640 | 17.467882 | 4.752101  |
| H  | 6.827578  | 14.104388 | 5.796188  | O | 12.068943 | 18.872640 | 2.472002  |
| H  | 8.055531  | 14.740455 | 4.679998  | C | 5.094298  | 15.925806 | -0.245570 |
| C  | 5.452961  | 12.539354 | 3.903420  | C | 3.974254  | 15.186739 | -0.964521 |
| H  | 4.837561  | 12.681124 | 4.800217  | H | 3.784659  | 14.210877 | -0.512295 |
| H  | 6.026483  | 11.616462 | 4.036475  | H | 4.281088  | 15.027684 | -2.005064 |
| H  | 4.783212  | 12.407673 | 3.046369  | H | 3.065142  | 15.791757 | -0.962831 |
| C  | 8.668232  | 16.150768 | -0.430255 | O | 5.980992  | 15.139723 | 0.296440  |

## References
